1 **Increased apoptotic priming of glioblastoma enables therapeutic targeting by**

2 **BH3-mimetics**

3

4

5 Anna L Koessinger<sup>1,2</sup>, Dominik Koessinger<sup>1,2</sup>, Kevin Kinch<sup>3</sup>, Laura Martínez-Escardó<sup>2,4</sup>, Nikki  
6 R Paul<sup>1</sup>, Yassmin Elmasry<sup>2</sup>, Gaurav Malviya<sup>1</sup>, Catherine Cloix<sup>1,2</sup>, Kirsteen J Campbell<sup>1,2</sup>,  
7 Florian J Bock<sup>1,2</sup>, Jim O'Prey<sup>1</sup>, Katrina Stevenson<sup>2</sup>, Colin Nixon<sup>1</sup>, Mark R Jackson<sup>2</sup>, Gabriel  
8 Ichim<sup>5</sup>, William Stewart<sup>3</sup>, Karen Blyth<sup>1,2</sup>, Kevin M Ryan<sup>1,2</sup>, Anthony J Chalmers<sup>2</sup>, Jim C  
9 Norman<sup>1,2</sup> and Stephen WG Tait<sup>1,2</sup> \*

10

11 <sup>1</sup> CRUK Beatson Institute, Bearsden, Glasgow, G61 1BD, UK.

12 <sup>2</sup> Institute of Cancer Sciences, College of Medical, Veterinary and Life Sciences, University  
13 of Glasgow, Bearsden, Glasgow, G61 1QH, UK.

14 <sup>3</sup> Department of Neuropathology, Queen Elizabeth University Hospital and Institute of  
15 Neuroscience and Psychology, University of Glasgow, UK.

16 <sup>4</sup> Department of Biochemistry and Molecular Biology and Institute of Neurosciences, Faculty  
17 of Medicine, Universitat Autònoma de Barcelona, Barcelona, Spain.

18 <sup>5</sup> Cancer Research Centre of Lyon (CRCL) INSERM 1052, CNRS 5286, Lyon, France.

19

20 \*To whom correspondence should be addressed: Stephen Tait

21 CRUK Beatson Institute, University of Glasgow, Glasgow, G61 1BD, UK

22 Email: [stephen.tait@glasgow.ac.uk](mailto:stephen.tait@glasgow.ac.uk)

23

24 **Running title:** Overcoming apoptotic resistance in GBM

25 **Keywords:** apoptosis/BH3-mimetics/glioblastoma/resistance/stem cells

26

27

28 **Abstract**

29 *IDH* wild-type glioblastoma (GBM) is the most prevalent malignant primary brain tumour in  
30 adults. GBM typically has a poor prognosis, mainly due to a lack of effective treatment  
31 options leading to tumour persistence or recurrence. Tackling this, we investigated the  
32 therapeutic potential of targeting anti-apoptotic BCL-2 proteins in GBM. Levels of anti-  
33 apoptotic BCL-xL and MCL-1 were consistently increased in GBM compared with non-  
34 malignant cells and tissue. Moreover, we found that relative to their differentiated  
35 counterparts, patient-derived GBM stem-like cells also displayed higher expression of anti-  
36 apoptotic BCL-2 family members. Surprisingly, high anti-apoptotic BCL-xL and MCL-1  
37 expression correlated with heightened susceptibility of GBM to BCL-2 family protein-  
38 targeting BH3-mimetics. This is indicative of increased apoptotic priming. Indeed, GBM  
39 displayed an obligate requirement for MCL-1 expression in both tumour development and  
40 maintenance. Investigating this apoptotic sensitivity, we found that sequential inhibition of  
41 BCL-xL and MCL-1 led to robust anti-tumour responses *in vivo*, in the absence of overt  
42 toxicity. These data demonstrate that BCL-xL and MCL-1 pro-survival function is a  
43 fundamental prerequisite for GBM survival that can be therapeutically exploited by BH3-  
44 mimetics.

## 45 **Introduction**

46 In adults, *IDH* wild-type glioblastoma (*IDHwt* GBM) is the most prevalent and malignant  
47 primary brain tumour (1, 2). Despite current multimodal treatment, comprising surgical  
48 resection with adjuvant radiotherapy and alkylating chemotherapy, the median survival in  
49 newly diagnosed patients remains poor at less than 12 months (3, 4). Resistance to  
50 conventional radio- and chemotherapy primarily emerges from persistent cancer stem cells,  
51 a tumourigenic subpopulation of GBM cells, consisting of heterogenous subclones and  
52 capable of self-renewal (5, 6). Therefore, targeting cells with stem-like capabilities is  
53 essential to develop effective treatment options and improve patient survival.

54

55 Treatment resistance can often be attributed to cells circumventing therapy-induced cell  
56 death. Apoptosis is an evolutionarily conserved type of cell death with broad ranging  
57 importance in biology (7). The intrinsic (mitochondrial) pathway of apoptosis is controlled by  
58 pro- and anti-apoptotic members of the B cell lymphoma 2 (BCL-2) family that regulate  
59 mitochondrial outer membrane integrity (8). During apoptosis, pro-apoptotic BCL-2 proteins  
60 cause mitochondrial outer membrane permeabilisation or MOMP. This leads to the release  
61 of mitochondrial intermembrane space proteins, including cytochrome *c*, that activate  
62 caspase proteases leading to apoptotic cell death (8).

63

64 Increased anti-apoptotic BCL-2 protein expression has been described in a wide range of  
65 solid cancers and is often linked with insensitivity to conventional chemotherapy (9-11).  
66 Recently, a new class of chemotherapeutics called BH3-mimetics have been developed that  
67 target pro-survival BCL-2 function, sensitising to cell death. BH3-mimetics have proven to be  
68 highly effective in haematologic malignancies. For instance, venetoclax (ABT-199), a BCL-2  
69 targeted BH3-mimetic (12), is in clinical use for chronic lymphocytic leukaemia (CLL) (13)  
70 and acute myelogenous leukaemia (AML) (14, 15). CLL cells typically express high levels of  
71 anti-apoptotic BCL-2 protein. Nevertheless, the high intrinsic apoptotic sensitivity - also  
72 called apoptotic priming - of CLL renders it sensitive to venetoclax. For solid cancers,

73 venetoclax is currently being tested in combination with conventional chemotherapeutic  
74 agents. The combination of venetoclax and tamoxifen has progressed to early phase clinical  
75 trials in patients with estrogen receptor positive (ER+), high BCL-2 expressing breast cancer  
76 (16). Other BH3-mimetics developed to target BCL-xL and MCL-1 have shown promising  
77 pre-clinical results in combination with inhibitors of MEK1/2 for solid cancers harbouring  
78 oncogenic mutations in the MAPK pathway (17-19). Approximately 10% of GBM carry a  
79 mutation of isocitrate dehydrogenase 1 (*IDH1*) (1), which has been linked with increased  
80 sensitivity to treatment with BH3-mimetics targeting BCL-xL (20). Furthermore, previous  
81 studies have proposed BCL-xL as a treatment target in combination with ionising radiation  
82 (21) and other chemotherapeutics (22) in GBM.

83

84 Because tumours retain characteristics of their tissue origins, brain derived glial cancers  
85 exhibit defined cellular hierarchies found in brain development and homeostasis (23-25).  
86 During central nervous system development, anti-apoptotic BCL-2 family proteins play a  
87 pivotal role in promoting cell survival (26, 27) while with adulthood the brain becomes  
88 refractive to apoptosis (28). Given this important role in cell survival, we hypothesised that  
89 GBM, while phenocopying the developing brain, might display similar anti-apoptotic survival  
90 dependencies. Indeed, we found increased levels of the major pro-survival proteins in GBM,  
91 specifically within the stem-cell enriched population. Surprisingly, high BCL-xL and MCL-1  
92 expression correlates with increased apoptotic sensitivity, demonstrating that GBM stem-like  
93 cells are primed for apoptosis. Exploiting this, we found that sequential dosing of BCL-xL  
94 and MCL-1 targeting BH3-mimetics enables effective treatment responses both, *in vitro* and  
95 *in vivo*. This could offer a therapeutically tractable approach for patients with *IDHwt* GBM.

96 **Results**

97 *High anti-apoptotic BCL-2 family protein expression correlates with increased BH3-mimetic*  
98 *sensitivity in GBM*

99 Cancer stem cells are proposed to give rise to GBM and contribute to therapeutic resistance  
100 (23). We therefore sought to assess the apoptotic sensitivity of GBM stem-like cells (GSC)  
101 by treating them with BH3-mimetics with selectivity for BCL-2, BCL-xL and MCL-1. For this  
102 purpose, we used a panel of patient-derived *IDHwt* GSC, cultured under conditions to  
103 maintain their tumour specific phenotype and stem cell properties (29, 30). Cell viability was  
104 measured using IncuCyte live-cell imaging and SYTOX Green exclusion. Importantly, three  
105 cell lines (G1, G7 and R24 GSC) were sensitive to A-1331852, a selective BCL-xL  
106 antagonist (31) whereas two cell lines (R9 and R15 GSC) displayed sensitivity to S63845, a  
107 potent and selective MCL-1 inhibitor (32) (**Figure 1A,B**). Moreover, the commonly used  
108 GBM cell line U87MG displayed increased sensitivity to BCL-xL inhibition when cultured  
109 under stem cell-enriching conditions. One cell line (E2 GSC) was resistant to all single agent  
110 treatments. Treatment with venetoclax (ABT-199), a BCL-2 specific inhibitor, induced no  
111 more than 26% cell death in any GSC and therefore was comparably inefficient. Collectively,  
112 these data show that the majority of tested GSC display survival dependence on anti-  
113 apoptotic BCL-2 family function.

114 We next used immunoblotting to determine if the individual apoptotic sensitivity of the  
115 patient-derived GSC corresponded to anti-apoptotic BCL-2 protein expression. In  
116 comparison to human differentiated astrocytes, all GSC exhibited higher expression of BCL-  
117 xL and MCL-1 and partially higher expression of BCL-2 (**Figure 1C**). Consistent with their  
118 origins, GSC expressed higher levels of neural stem cell marker SOX2 (33), while cell  
119 lineage specific GFAP was more abundant in astrocytes (34). Subsequently, we investigated  
120 whether anti-apoptotic BCL-2 protein expression also differed in GBM tumours and adjacent  
121 brain tissue. Using immunohistochemistry (IHC) we compared BCL-xL and MCL-1  
122 expression in matched specimens of three patients diagnosed with GBM. In all cases, MCL-  
123 1 and BCL-xL were increased in the tumour cores compared to the predominantly non-

124 tumorous margins (**Figure 1D,E**). Extending this analysis, we determined MCL-1 and BCL-  
125 xL mRNA expression in different glioma subtypes and normal brain tissue using the publicly  
126 available REMBRANDT database. In line with our IHC analysis, *BCL-xL* and *MCL-1* mRNA  
127 levels were more expressed in GBM compared with lower grade gliomas and normal brain  
128 tissue (**Supplementary Figure 1A,B**). These data demonstrate specific sensitivities of  
129 patient-derived GSC to individual BH3-mimetics and increased expression of anti-apoptotic  
130 BCL-2 proteins in both primary GBM tumour tissues and GSCs.

131

### 132 *Anti-apoptotic MCL-1 is required for the growth and survival of GBM*

133 While it has previously been shown that GBM tumoursphere formation is promoted by high  
134 BCL-xL expression (35), little is known about the role of MCL-1 on GBM growth and  
135 maintenance. To explore the importance of MCL-1 in GBM formation and growth *in vivo*, we  
136 selected a tumorigenic cell line (G7 GSC) and deleted *MCL-1* using CRISPR/Cas9 genome  
137 editing. Western blot analysis confirmed efficient *MCL-1* deletion, while the expression of  
138 BCL-xL, SOX2 and GFAP was increased in the MCL-1<sup>CRISPR</sup> cells (**Supplementary Figure**  
139 **2A**). MCL-1<sup>CRISPR</sup> GSC were found to proliferate at the same rate and retained a similar  
140 capability to form neurospheres as their vector<sup>CRISPR</sup> counterparts (**Figure 2A,**  
141 **Supplementary Figure 2B**). We next investigated whether MCL-1 was required for  
142 tumorigenesis *in vivo*. iRFP-labelled vector<sup>CRISPR</sup> and MCL-1<sup>CRISPR</sup> G7 GSC were  
143 orthotopically injected in CD-1 nude mice and tumour growth was monitored with cranial  
144 magnetic resonance imaging (MRI) and iRFP signal detection (36). We observed a  
145 substantial impairment of tumour growth in MCL-1 deleted tumours (**Figure 2B,C;**  
146 **Supplementary Figure 2C**) that was reflected in the significantly prolonged survival of these  
147 mice (**Figure 2D**). Importantly, IHC analysis of the end-stage tumours revealed an outgrowth  
148 of MCL-1 proficient tumour cells in the MCL-1<sup>CRISPR</sup> xenografts (**Supplementary Figure 2D**).  
149 In contrast to the *in vitro* analysis, these data reveal a key role for MCL-1 in initiation and  
150 growth of GBM *in vivo* and identify MCL-1 as a promising therapeutic target. Our results also  
151 support an important pro-survival role for anti-apoptotic MCL-1 in GBM.

152

153 *GSC display increased apoptotic priming and can be effectively killed by dual BCL-xL, MCL-*  
154 *1 inhibition*

155 Currently, no treatment regimen is able to achieve long-time remission of GBM, with tumours  
156 inevitably developing resistance to treatment and recurring, eventually leading to patient  
157 death (37). Anti-apoptotic BCL-2 family members have overlapping binding affinities for  
158 several pro-apoptotic BH3-only proteins (8). We asked whether GBM might circumvent  
159 single inhibitor treatment by compensatory upregulation of untargeted anti-apoptotic  
160 proteins. Indeed, upon treatment with BCL-xL inhibitor A-1331852 or navitoclax (ABT-737),  
161 an inhibitor of BCL-xL, BCL-2 and BCL-w, we found that levels of MCL-1 protein were  
162 increased in surviving GSC (**Figure 3A, Supplementary Figure 3A**). We reasoned that  
163 GBM might counteract drug-induced neutralisation of BCL-xL function via increased MCL-1  
164 expression. To address this, we treated MCL-1<sup>CRISPR</sup> G7 and R24 GSC with the BCL-xL  
165 inhibitors A-1331852 or ABT-263. Cell viability was measured by live-cell IncuCyte imaging  
166 with Sytox Green exclusion or in a clonogenic survival assay. In all cases, MCL-1 deletion  
167 significantly increased cellular sensitivity to the BCL-xL specific antagonist and navitoclax  
168 (**Figure 3B, Supplementary Figure 3B**). Similarly, dual inhibition of BCL-xL and MCL-1 with  
169 A-1331852 and S63845 displayed a substantial combinatorial effect resulting in up to 100%  
170 cell death across a range of GSC, determined in both short term cell viability assays and  
171 long-term clonogenic survival assays (**Figure 3C,D; Supplementary Figure 3C,D**). This  
172 effect was observed even at 10-fold decreased doses compared to effective single  
173 treatment. Verifying on-target engagement of mitochondrial apoptosis, combined MCL-1 and  
174 BCL-xL inhibition led to Caspase 3 and PARP-1 cleavage as well as cell death in a BAK,  
175 BAX and caspase-dependent manner (**Figure 3E, Supplementary Figures 3E-F**).  
176 Sensitivity of GBM cells to chemotherapy and ionising radiation inversely correlates with  
177 tumour cell stemness (6, 38, 39). We therefore hypothesised that the differentiated  
178 counterparts (DIFF) of the patient-derived GBM stem-like cells may be more sensitive  
179 towards BH3-mimetic treatment. To ensure comparable culture conditions for GSC and

180 DIFF, we conducted these experiments using 1% FCS containing Ad-DMEM medium during  
181 the experimental procedure. Cells were treated with A-1331852 and S63845 to inhibit BCL-  
182 xL and MCL-1 respectively and cell viability measured by live-cell IncuCyte imaging and  
183 Sytox Green exclusion. Following treatment with single BH3-mimetic, we found that cell  
184 viability was largely comparable for DIFF and GSC (**Supplementary Figure 3G**).  
185 Surprisingly, following dual MCL-1 and BCL-xL inhibition, E2 and R15 GSC were more  
186 sensitive than DIFF cells; while >50% cell death was observed within about 5 hours in GSC,  
187 it was not observed in DIFF cells until 16 hours (**Figure 3F**). Moreover, 100% cell death was  
188 not achieved in either of the DIFF cell lines. Together, these data suggest that GSCs are  
189 more primed for apoptotic cell death than DIFF cells. To investigate this further, we  
190 compared expression of pro- and anti-apoptotic BCL-2 proteins in the paired cell lines.  
191 Although more sensitive to apoptosis, GSCs displayed higher levels of anti-apoptotic BCL-2  
192 proteins, BCL2, BCL-xL and MCL-1 than their differentiated counterparts (**Supplementary**  
193 **Figure 3H**). In summary, these data indicate that GSC can display increased apoptotic  
194 priming and reveal potent cytotoxic effects of dual-targeting BCL-xL and MCL-1.

195

#### 196 *TrkB signalling regulates sensitivity of GSC to anti-apoptotic treatment*

197 We next sought to explore the differential priming between GSC and their isogenic  
198 differentiated counterparts. To this end, bulk RNA sequencing data from E2, G7 GSC and  
199 their DIFF counterparts was analysed (30). Consistent with enrichment of GSC, RNAseq  
200 analysis revealed increased levels of CD34, a surface glycoprotein, first described as marker  
201 for haematopoietic progenitor cells (40). Interestingly, high expression of *NTRK2* mRNA was  
202 detected in both GSC (**Figure 4A**). This finding was validated in E2 and G7 GSC as well as  
203 R15 and R24 GSC via immunoblotting (**Figure 4B, Supplementary Figure 4A**). *NTRK2* the  
204 gene coding for the tropomyosin receptor kinase B (TrkB) is primarily known for its function in  
205 neurodevelopment inducing downstream signalling upon binding of brain-derived  
206 neurotrophic factor (BDNF) (41). Recently, Wang and colleagues have reported a role for  
207 TrkB-expressing cancer stem cells in GBM progression in response to BDNF stimulation by



208 differentiated tumour cells (42). As TrkB-mediated activation of MAPK and PI3K-AKT  
209 signalling is generally associated with cell survival (43), we hypothesised that BDNF-  
210 mediated TrkB stimulation might enable GSC to evade cell death. Unexpectedly, following  
211 stimulation of GSC with BDNF or 7,8-dihydroxyflavone (7,8-DHF), a specific TrkB agonist,  
212 we found that GSC were further sensitised to cell death following treatment with BH3-  
213 mimetics targeting BCL-xL and or MCL-1 (**Figure 4C, Supplementary Figure 4B**). This  
214 sensitising effect was not observed in the DIFF cells (**Figure 4D**). DIFF cells express  
215 significantly lower levels of the TrkB receptor and therefore prove to be comparably  
216 unresponsive to BDNF stimulation (**Supplementary Figure 4C**). BDNF-induced TrkB  
217 phosphorylation also led to increased BCL-xL protein expression, alongside stabilisation of  
218 the BIM protein downstream of MAPK signalling, independently of BCL-xL and MCL-1  
219 inhibition (**Figure 4E**). These data demonstrate a key role for BDNF-TrkB signalling in the  
220 increased apoptotic priming of GSCs.

221

222 *Combined BCL-xL and MCL-1 inhibition causes apoptosis in human GBM ex vivo*

223 Current *in vitro* methodologies fail to recapitulate important aspects of the brain  
224 microenvironment and tissue context. Given this, we sought to use a more physiologically  
225 relevant model to investigate functional responses to BCL-xL and MCL-1 inhibition in GBM.  
226 For this purpose, we developed an assay tailored to the use of freshly resected human GBM  
227 to be cultured *ex vivo* as tissue slices that could be readily exposed to candidate drugs  
228 (experimental setup illustrated in **Supplementary Figure 5A**). All three patients included in  
229 the study were diagnosed with *IDHwt* GBM. Tissue slices were treated for 72 hours in total.  
230 In all cases, we found that a combined therapy with A-1331852 and S63845 (BCL-xL and  
231 MCL-1 inhibition) significantly reduced tumour cell count compared with single drug  
232 treatment or control (**Figure 5A-D, Supplementary Figure 5B-D**). Moreover, dual treatment  
233 induced a significant reduction of cell proliferation (Ki67 IHC) and amount of SOX2 positive  
234 tumour cells (**Figure 5E,F, Supplementary Figure 5E,F**), while Caspase 3 cleavage was  
235 increased. This data indicates that the dual treatment efficiently targets GBM stem-like cells

236 *ex vivo*. Importantly, the integrity of the brain tissue and vasculature was maintained

237 **(Supplementary Figure 5G).**

238 In recent years, selective MCL-1 and BCL-xL inhibitors have been developed that show

239 effective *in vivo* potency (31, 32). However, systemic exposure to both inhibitors is limited

240 due to its combined toxicity (44). Because the blood-brain-barrier is only permissible to

241 certain drugs, local or intrathecal drug application (45) might allow to circumvent systemic

242 side effects in a clinical setting. To explore potential toxicities to resident brain cells, we

243 obtained brain slices from 11-week old adult mice and exposed them to dual treatment with

244 the indicated BH3-mimetics. In regions of the subventricular zone, an important neural stem

245 cell niche, we detected only a moderate increase of cleaved Caspase 3 in a fraction of glial

246 and neural progenitor cells (GFAP and NESTIN IF stain) **(Figure 5G,H)**. In summary, these

247 data suggest that dual targeting of BCL-xL and MCL-1 may provide a novel therapeutic

248 approach to treat GBM.

249

250 *Priming with BCL-xL inhibition renders GSC vulnerable to MCL-1 inhibition, promoting*

251 *tumour regression in vivo*

252 Given the potency of joint BCL-xL/MCL-1 inhibition in our *in vitro* and *ex vivo* findings, we

253 sought to maximise this combinatorial effect whilst mitigating possible systemic toxicity. To

254 address this, we investigated which pro-apoptotic proteins are involved in regulating intrinsic

255 apoptosis in GBM. Upon single agent treatment with A-1331852, we observed upregulation

256 of the BH3-only protein BIM as well as anti-apoptotic MCL-1. This was seen in both control

257 and BAX/BAK deficient GSC **(Figure 6A)**. BIM is an important BH3-only protein in the

258 canonical apoptotic pathway where it functions by regulating both BCL-xL and MCL-1

259 mediated cell death responses (46). We hypothesised that MCL-1 might bind and neutralise

260 BIM that is released by the A-1331852 complexing to BCL-xL. Accordingly,

261 immunoprecipitation of MCL-1 following treatment with A-1331852 revealed increased

262 binding of BIM to MCL-1 **(Figure 6B)**. To explore whether this mechanism could be

263 therapeutically exploited, we questioned whether BCL-xL inhibition would render GSC more

264 sensitive to subsequent MCL-1 inhibition. GSC were treated with a BH3-mimetic targeting  
265 either BCL-xL or MCL-1 for up to 48 hours followed by a washout and 24 hours treatment  
266 pause. Subsequently the complementary inhibitor was applied for up to 48 hours. Whereas  
267 prior inhibition with MCL-1 inhibitor failed to sensitise the cells to BCL-xL inhibition, pre-  
268 treatment with the BCL-xL inhibitor substantially increased the susceptibility of GSC to  
269 subsequent MCL-1 inhibition (**Figure 6 C,D**). To further investigate the relevance of BIM in  
270 mediating apoptosis following BCL-xL and MCL-1 inhibition, we deleted BIM by  
271 CRISPR/Cas9 genome editing (**Supplementary Figure 6A**). Using IncuCyte live cell  
272 imaging and Sytox Green exclusion to detect cell death under treatment we observed that  
273 knockout of BIM did not impede the sensitivity of G7 GSC to concurrent dual BCL-xL and  
274 MCL-1 inhibition (**Supplementary Figure 6B**). However, after pre-treatment with BCL-xL  
275 inhibitor A-1331852 G7 BIM<sup>CRISPR</sup> GSC were less primed for following MCL-1 inhibition  
276 compared to their vector<sup>CRISPR</sup> counterparts (**Figure 6E**). These results indicate that Bcl-xL-  
277 inhibition mediates sensitisation of GSC to subsequent MCL-1 neutralisation via pro-  
278 apoptotic BIM.

279 Finally, we aimed to investigate the potency of alternating BH3-mimetic treatments in GBM  
280 *in vivo*. Due to the poor blood-brain-barrier penetrance of ABT-263, we chose a  
281 subcutaneous model. As the GSC used in our study do not grow as subcutaneous  
282 xenografts we explored whether human U87MG respond to combined and alternating  
283 inhibition of BCL-xL and MCL-1 in like manner to GSC. Indeed, we found that dual inhibition  
284 of BCL-xL and MCL-1 induced substantial cell death in U87MG neurospheres  
285 (**Supplementary Figure 6C**). Testing different treatment regimens using a clonogenic  
286 survival assay, we found a profound decrease in colony formation upon alternating treatment  
287 with ABT-263 and S63845 (**Supplementary Figure 6D**). In our *in vivo* cohort, mice were  
288 treated with vehicle or alternating therapy with ABT-263 and S63845 every 48 hours for two  
289 weeks upon tumour establishment (treatment schematic illustrated in **Supplementary**  
290 **Figure 6E**). Compared to mice receiving vehicle control, mice treated with the sequential  
291 therapy showed significant attenuation and/or regression of tumours (**Figure 6F**). Most

292 importantly, we observed significantly improved survival in mice treated with ABT-263,  
293 followed by S63845 (**Figure 6G**). One mouse had a complete tumour regression after  
294 sequential treatment with no reoccurrence of the subcutaneous tumour over an 8-week  
295 follow up period. With this treatment schedule no significant weight loss (**Supplementary**  
296 **Figure 6F**) or signs of neurological deficits were detected in mice. Histopathological analysis  
297 of tumours reaching clinical end point showed a higher prevalence of a large central necrotic  
298 areas in within the treatment cohort compared to vehicle control (83% vs. 33%)  
299 (**Supplementary Figure 6G**). Collectively, these data demonstrate the therapeutic potential  
300 of sequential BCL-xL and MCL-1 inhibition in GBM.

301 **Discussion**

302 Largely due to a dearth of effective treatment options, GBM patients have a dismal  
303 prognosis (37). Addressing this, we investigated the therapeutic potential of targeting anti-  
304 apoptotic BCL-2 proteins in GBM. Our analysis revealed high expression of anti-apoptotic  
305 BCL-xL and MCL-1 in GBM. Moreover, we also observed increased expression of BCL-xL  
306 and MCL-1 in GBM stem-like cells - a population of cells that are key for GBM development  
307 and treatment resistance *in vivo* (5, 6). Rather than promoting apoptotic resistance, elevated  
308 anti-apoptotic BCL-xL and MCL-1 expression in GSC compared to isogenic DIFF correlated  
309 with increased susceptibility to targeted inhibition using BH3-mimetics. This indicates that  
310 GSC are inherently primed for apoptosis. Exploiting this, we found that GBM were sensitive  
311 to BH3-mimetics targeting either MCL-1 or BCL-xL. Crucially, alternating dosing with BCL-xL  
312 followed by MCL-1 specific BH3-mimetics, led to durable treatment responses with  
313 preceding BCL-xL inhibition sensitising to MCL-1 inhibition *in vivo*. These data highlight the  
314 therapeutic potential of targeting BCL-xL and MCL-1 in GBM.

315

316 Recently, highly specific and potent BH3-mimetics have been developed to specifically  
317 target BCL-2, BCL-xL and MCL-1 (12, 31, 32). We used these to probe the individual  
318 dependencies of GBM in a panel of patient-derived GSC. Importantly, we found that GBM  
319 cells are largely dependent on BCL-xL or MCL-1 for survival, whereas BCL-2 plays a lesser  
320 role. Genetic deletion of *MCL-1* corroborated its key role in both promotion and maintenance  
321 of GBM. Consistent with our findings, indirect targeting of MCL-1 through CDK7 inhibition,  
322 causing transcriptional repression, sensitises GBM cell lines to ABT-263 (47). Further, we  
323 could demonstrate that both BCL-xL and MCL-1 are highly expressed, not only in GBM  
324 tumour cores, but also in GBM stem-like cells compared to their isogenic differentiated  
325 counterparts and astrocytes. The high expression and dependence of GBM on anti-apoptotic  
326 BCL-2 function is consistent with an increased state of apoptotic priming. As Sarosiek and  
327 colleagues have demonstrated, the tissue of origin plays a major role in determining the  
328 apoptotic sensitivity of a cell (28), therefore the high dependency of stem-like cells on BCL-

329 xL and MCL-1 might relate to their resemblance of cerebral precursor cells. Both anti-  
330 apoptotic proteins play a major role in neurogenesis, while with brain maturation neurons  
331 become refractory to apoptotic cell death (26, 28).

332

333 Unexpectedly, we observed that in comparison to their differentiated counterparts, stem-like  
334 cells were more susceptible to BH3-mimetic treatment. Investigating the basis of the  
335 differential apoptotic priming we identified NTRK2, a stem-cell specific surface receptor (42)  
336 as a key component. NTRK2 signalling, mediated by the soluble brain derived neurotrophic  
337 factor BDNF, plays a major role in cell survival promotion of growth in glial tumours (42, 48).  
338 Surprisingly, we found that BDNF stimulation led to increased apoptotic priming. This result  
339 reinforces the notion that stem-like cells are especially dependent on the tight regulation of  
340 apoptotic sensitivity. More profound understanding of the tumour-environmental context  
341 should shed light on how these interactions can be therapeutically exploited to maximise  
342 treatment efficacy of BH3-mimetics.

343

344 To facilitate translation to the clinic, we developed an *ex vivo* assay to investigate  
345 chemosensitivity of fresh patient derived GBM tissue to BCL-2 targeting BH3-mimetics.  
346 Across different freshly resected *IDHwt* GBM samples, we found that targeting both MCL-1  
347 and BCL-xL led to an extensive induction of apoptosis and sustained reduction in tumour cell  
348 viability *ex vivo*, without compromising tissue and vessel integrity. Following inhibition of  
349 BCL-xL we found an increased amount of BIM bound to MCL-1, leading to a sensitisation of  
350 the GBM cells to MCL-1 antagonists. This mirrors studies in haematologic malignancies  
351 where the susceptibility to BH3-mimetics was dependent on BCL-2 complexed to BIM (49,  
352 50) and increased BIM levels sensitised to BCL-2 inhibition (51).

353

354 To circumvent reported systemic toxicity, we developed a sequential treatment schedule.  
355 Our analysis of bioavailability in an orthotopic patient-derived xenograft revealed that the  
356 blood-brain-barrier is barely penetrable for ABT-263. Using the GBM cell line U87MG in a

357 subcutaneous xenograft model, the observed effect of sequential priming could also be  
358 recapitulated *in vivo* with a profound regression of tumour size and significant survival  
359 benefit. Importantly, the brain, due to its blood-brain-barrier, provides unique opportunities  
360 for drug delivery. For instance, local drug delivery or intrathecal chemotherapy can be  
361 exerted to use the blood-brain-barrier and in turn circumvent systemic side effects (45). In  
362 summary, these data provide a rationale for further investigating alternating inhibition of  
363 BCL-xL and MCL-1 pro-survival function in GBM to maximise the therapeutic effect.  
364

365 **Materials and methods**

366 *Patient-derived GBM cell lines and cell culture reagents*

367 Patient-derived GBM stem-like cells (E2, G1, G7, R9, R15, R24 GSC), obtained from  
368 surgical resection specimens of anonymised patients as described (52, 53), were kindly  
369 provided by Prof. Colin Watts. GSC and U87MG were cultured in serum-free Advanced  
370 Dulbecco's modified Eagle's medium F12 (Thermo Fisher Scientific), supplemented with  
371 2mM glutamine, 4µg/ml heparin (Sigma), 1% B27 (Thermo Fisher Scientific), 0.5% N2  
372 (Thermo Fisher Scientific), 20ng/ml EGF and 10ng/ml FGF (Thermo Fisher Scientific). DIFF  
373 cells were cultured in 10% foetal calf serum (FCS) containing high-glucose DMEM (Thermo  
374 Fisher Scientific) complemented with 2mM glutamine. Human astrocytes were originally  
375 provided by Prof. Steven Pollard as human foetal neural stem cells and previously  
376 differentiated to astrocytes by 7 days culture in differentiation inducing medium as described  
377 before (54). All cells were kept in 37°C incubator at 5% CO<sub>2</sub> and, when grown as  
378 monolayers on Matrigel (Corning) pre-coated plates or as spheres in uncoated plates. For all  
379 experiments, cells were used up to ten passages after thawing. All cell lines used were  
380 routinely tested for mycoplasma.

381 For our *in vitro* studies the following drugs and chemicals were used: ABT-199 (AdooQ  
382 BioScience, #A12500-50), ABT-263 (ApexBio, #A3007), ABT-737 (ApexBio, #A8193),  
383 A1331852 and A1155463 (ApexBio, #B6164 and #B6163), S63845 (Chemgood, #C-1370),  
384 Actinomycin D (Calbiochem, #114666), q-VD-OPh (QVD, AdooQ BioScience, #A14915-25),  
385 Sytox Green (Thermo Fisher Scientific, #S7020), Brain-derived neurotrophic factor (BDNF;  
386 Peprotech, #450-02), 7,8-Dihydroxyflavone hydrate (7,8-DHF; Merck, #D5446).

387

388 *Lentiviral transduction*

389 GSC transduction was performed using CRISPR/Cas9 genome editing with the following  
390 guide sequences:

391 *hBAX*: 5'-AGTAGAAAAGGGCGACAACC-3'

392 *hBAK*: 5'-GCCATGCTGGTAGACGTGTA-3'



393 *hMCL-1.1: 5'-GGGTAGTGACCCGTCCTAC-3'*

394 *hMCL-1.2: 5'-GTATCACAGACGTTCTCGTA-3'*

395 *hBIM: 5'-TACCCATTGCACTGAGATAG-3'*

396 For stable cell line generation HEK293-FT cells ( $4 \times 10^6$  in a 10 cm dish) were transfected  
397 using 4  $\mu$ g polyethylenimine (PEI, Polysciences) per  $\mu$ g plasmid DNA with the  
398 LentiCRISPRv2-puro (Addgene #52961) or LentiCRISPRv2-blasti (55) backbone, lentiviral  
399 transfer vector plasmid, packaging plasmid (Addgene #14887) and envelope plasmid  
400 pUVSVG (Addgene #8454), mixed in a 4:2:1 ratio. DNA/PEI mixtures were incubated at  
401 room temperature for 10 to 15 minutes, prior to application on HEK293-FTs. 24 and 48  
402 hours later, virus containing supernatant was harvested and filtered (0.45  $\mu$ M). Virus was  
403 extracted using Lenti-X concentrator (Clontech Takara) according to the manufacturer's  
404 instructions. The virus containing pellet was resuspended in serum-free stem-cell medium  
405 and target cells were infected in the presence of 1  $\mu$ g/ml polybrene (Sigma Aldrich). Two  
406 days following infection, cells were selected by growth in puromycin (E2: 1  $\mu$ g/ml, G7:  
407 0.5  $\mu$ g/ml; Sigma Aldrich) or blasticidin (G7, R15 and R24: 10  $\mu$ g/ml; InvivoGen) containing  
408 medium. As described previously, plasmids encoding iRFP IRES puro have been inserted  
409 into a pBABE vector (36).

410

#### 411 *Cell proliferation and live-cell viability assay*

412 Cell death and cell confluence were determined using live-cell imaging in the IncuCyte Zoom  
413 and S3 (Sartorius). For cell confluence  $50 \times 10^3$  cells were seeded in Matrigel-coated 6-well  
414 plates. Cell area per well was measured using IncuCyte imaging analysis software  
415 (Sartorius). For cell death assays,  $6 \times 10^3$  or  $12 \times 10^3$  GSC per well were seeded in Matrigel-  
416 coated 96-well plates and treated with the indicated drugs in the presence of 30nM SYTOX  
417 Green. Plates were applied to the IncuCyte imager at 37°C in a humidified 95% air/ 5% CO<sub>2</sub>  
418 incubator. Every hour, two images per well were taken over a period of 24 to 48 hours.  
419 Images were presented in green phase contrast at 10x magnification. For image  
420 quantification IncuCyte imaging analysis software was used. Percentage cell death was

421 calculated by normalising against maximal cell death control upon 24 to 48 hours treatment  
422 (1 $\mu$ M Actinomycin D, 10 $\mu$ M ABT-737 and 1 $\mu$ M S63845). Alternatively, 100% cell death  
423 control was verified by visual inspection of IncuCyte images, where 100% Sytox Green  
424 positive cells = total cell count.

425

#### 426 *Clonogenic survival assay*

427 GSC were seeded at a density of 250 cells per well in Matrigel-coated, 6-well plates with  
428 three technical repeats per experiment and left to adhere overnight. After 16 hours cells  
429 were treated as indicated for 24 hours, followed by replacement of fresh media. Cells were  
430 left to form colonies for 2 to 3 weeks prior to methanol fixation and crystal violet staining.  
431 Visible colonies consisting of minimum 50 cells were counted manually.

432

#### 433 *Neurosphere formation assay*

434 G7 GSC vector<sup>CRISPR</sup> and MCL-1<sup>CRISPR</sup> were seeded at a density of 10 cells per well in  
435 uncoated 96-well plates. Serum-free stem-cell medium was refreshed every week. Spheres  
436 were left to grow for 14 days before manual scoring of the 60 inner wells.

437

#### 438 *Immunoblotting, immunoprecipitation and antibodies*

439 GSC were lysed and collected in RIPA buffer (50mM Tris-HCl pH 7.5, 150 mM NaCl, 1 mM  
440 EDTA, 1% NP-40), supplemented with complete protease inhibitor (Roche) and PhosSTOP  
441 (Roche). Protein concentration was determined using Pierce BCA protein assay kit (Thermo  
442 Fisher Scientific) and protein lysates were subjected to electrophoresis through SDS-PAGE  
443 or 4-12% NuPage Bis-Tris protein gels (Thermo Fisher Scientific) followed by blotting onto  
444 nitrocellulose membranes. After blocking in 5% non-fat, dry milk or 2% BSA (Roche),  
445 membranes were probed with primary antibody (dilution 1:1000) BAK (Cell Signaling  
446 #12105), BAX (Cell Signaling #2772), BCL-2 (Cell Signaling #2762), BCL-xL (Cell Signaling  
447 #2762), MCL-1 (Cell Signaling #5453), BIM (Cell Signaling #2933), TrkB (Cell Signaling  
448 #4603), pTrkA (Tyr674/675)/pTrkB (Tyr706/707) (Cell Signaling #4621), ERK1/2 (Cell

449 Signaling #4695), pERK1/2 (Cell Signaling #4370), AKT (Cell Signaling #9272), pAKT  
450 (Ser473; Cell Signaling #4066), Caspase 3 (Cell Signaling #9662), cleaved Caspase 3 (Cell  
451 Signaling #9664), PARP1 (Cell Signaling #9532) and SOX2 (Abcam #ab92494), NESTIN  
452 (Abcam #ab22035), GFAP (Santa Cruz #SC-6170) at 4°C overnight in blocking buffer.  $\alpha$ -  
453 tubulin (Sigma #T5168, 1:5000),  $\beta$ -tubulin (Cell Signaling #2146, 1:5000), HSP60 (Cell  
454 Signaling #4870, 1:1000), or actin (Sigma #A4700, 1:5000) served as loading controls. Each  
455 blot was probed with primary antibodies and a loading control. Representative loading  
456 controls are shown in figures. Membranes were incubated with Li-Cor secondary antibodies  
457 (IRDye 680RD donkey anti-mouse, IRDye 800CW donkey anti-rabbit, IRDye 800CW donkey  
458 anti-goat) for 1 hour at room temperature.

459 For immunoprecipitation (IP), rabbit antibodies were coupled to magnetic beads conjugated  
460 to anti-rabbit IgG (Dynabeads Sheep anti-rabbit IgG, Invitrogen, #11203D). The buffer  
461 containing 200 mM NaCl, 75 mM Tris-HCl pH 7, 15 mM NaF, 1.5 mM Na<sub>3</sub>VO<sub>4</sub>, 7.5 mM  
462 EDTA, 7.5 mM EGTA, 0.15% (v/v) Tween-20 and protein inhibitors (Thermo Fisher) were  
463 used to prepare cell lysates. Lysates were passed several times through a 26-gauge needle  
464 followed by centrifugation at 10,000g for 5 min at 4 °C. Lysates were added to the beads  
465 and rotated for 2 hours at 4 °C. After washes in Tween-20-containing buffer, lysates were  
466 analysed by immunoblotting.

467 Blots were imaged using Li-Cor Odyssey CLx (Li-Cor), acquired and processed using  
468 Image-Studio software (Li-Cor) and subsequently arranged using Adobe Illustrator.

469

#### 470 *Orthotopic intracranial and subcutaneous xenografts*

471 All mouse experiments were carried out in accordance with the Animals Act 1986 (Scientific  
472 Procedures on living animals) and the regulatory guidelines of the EU Directive 2010 under  
473 project licences PPL P4A277133 and PP6345023 and ethical review (University of  
474 Glasgow). For intracranial xenograft 7-week old female CD1-nude mice (Charles River, UK)  
475 were orthotopically injected with  $1 \times 10^5$  iRFP-labelled vector<sup>CRISPR</sup> and MCL-1<sup>CRISPR</sup> G7 GSC  
476 into the right striatum. Mice were monitored for the duration of the experiment and humanely

477 sacrificed when they showed neurological (hemiparesis, paraplegia) or general symptoms  
478 (hunched posture, reduced mobility, and/or weight loss >20%).  
479 For subcutaneous xenograft  $1 \times 10^6$  U87MG cells, previously cultured in stem-cell medium,  
480 were diluted in PBS and 50% growth factor reduced Matrigel and injected in the right flank of  
481 8-week old female CD1-nude mice (Charles River, UK). For *in vivo* dosing, ABT-263  
482 (ChemieTek #A263) was dissolved in 10% ethanol, 30% PEG glycol 400 and 60% Phosal  
483 50 PG at 20 mg/kg and administered via oral gavage. S63845 (ChemieTek #S63845) was  
484 prepared in 2% vitamin E/d- $\alpha$ -tocopheryl polyethylene glycol 1000 succinate (Sigma)  
485 immediately prior to IV administration by tail vein injection at 25 mg/kg. Mice were treated  
486 with a 48-hours pause between drug administrations over a 14 days period. Tumour growth  
487 was monitored by caliper measurement three times per week and volume calculated using  
488 the equation ( $[\text{length} \times \text{width}^2]/2$ ). Clinical end point, at which mice were euthanised, was  
489 15mm diameter or ulceration of the tumour.

490

#### 491 *Intravital cranial iRFP imaging and magnetic resonance imaging (MRI)*

492 To examine intravital, intracranial tumour growth in animals bearing iRFP-positive G7 GSC,  
493 mice were monitored by PEARL imaging (Li-Cor) as previously described (36). MRI scans  
494 performed on brain tumour bearing mice using a nanoScan PET/MRI scanner (Mediso  
495 Medical Imaging Systems, Hungary). Mice were maintained under inhaled isoflurane  
496 anaesthesia (induction 5% v/v; maintenance 1.5 - 2.0% v/v) in the medical air during imaging  
497 procedure duration. Whole brain T2 Fast Spin Echo (FSE) 3D Axial Sequences (slice  
498 thickness 1.0 mm, repetition time (TR) 2000 msec, echo time (TE) 83.7 msec, Flip Angle 90  
499 degrees) were used to acquire MRI scans. For assessments of scans, volume-of-interest  
500 (VOI) was manually drawn around the tumour region on MRI scans by visual inspection.  
501 Separate VOI were drawn for each scan to adjust for the position of the mice on the scanner  
502 and tumour size.

#### 503 *Patient-derived GBM specimens and tissue culture*

504 GBM specimens were obtained from surplus tumour tissue resected from patients treated  
505 within the OPARATIC study (NCT01390571). Patients had consented for use of surplus  
506 tissue for future research projects.

507 Fresh GBM tissues were obtained from surplus surgical resection tissue from patients at the  
508 Queen Elizabeth University Hospital (QEUH) in Glasgow after review by neuropathology  
509 with appropriate consent and in accordance with the NHS GG&C ethical committee review  
510 (Biorepository Application No. 432). The patient study was conducted in accordance with the  
511 Declaration of Helsinki. Neuropathological diagnosis and selected patient information are  
512 displayed in the figures. Further, details of these patients are restricted by institutional  
513 requirements. All experiments were performed conform to relevant regulatory standards of  
514 the CRUK Beatson Institute. Fresh samples were attenuated in 2% low gelling temperature  
515 agarose (Merck) and cut into 350µm thick slices using the Mcllwain tissue slicer (Campden  
516 Instruments). Tissue slices were dissected under the microscope in ice cold PBS before they  
517 were transferred on top of hydrophilic Millicell cell culture inserts (Merck Millipore) into  
518 serum-free Advanced Dulbecco's modified Eagle's medium F12 supplemented with 0.5%  
519 N2, 1% B27, 1% glutamine and 1% penicillin-streptomycin and left to equilibrate for 24 hours  
520 at 37°C in a humidified 95% air/ 5% CO<sub>2</sub> incubator, before treatment with indicated drugs for  
521 72 hours. Following PBS washes brains were fixed in 4% paraformaldehyde (PFA)  
522 overnight.

523

#### 524 *Organotypic adult mouse brain slice culture*

525 Extracted brains from three 11-week old C57BL/6J mice were transferred to sterile PBS on  
526 ice, divided into both hemispheres and cut into coronal, 100µm thick slices using a  
527 vibratome (Campden Instruments 5100mz, advance speed 1mm/sec, oscillation amplitude  
528 1.5mm, 80Hz). Up to 5 slices per hemisphere were cut around the subventricular zone  
529 (SVZ). Slices were cultured on top of cell culture inserts in neurobasal medium as described  
530 in the previous section and left to equilibrate for 1 hour at 37°C in a humidified 95% air/ 5%

531 CO<sub>2</sub> incubator before treatment with indicated drugs for 24 hours. After PBS washes slices  
532 were fixed in 4% PFA overnight.  
533  
534 *Immunohistochemistry (IHC) and immunofluorescence (IF)*  
535 H&E staining and IHC was performed on 4µm formalin fixed paraffin embedded (FFPE)  
536 sections. For BCL-xL (Cell Signalling #2764), cleaved Caspase 3 (Cell Signalling #9661)  
537 and MCL-1 (Abcam # ab32087) IHC staining the Leica Bond Rx Autostainer was used. All  
538 FFPE sections underwent on-board antigen retrieval for 20 minutes using ER2 retrieval  
539 buffer (Leica, UK) before staining at a previously optimised dilution (BCL-xL 1:500; cleaved  
540 Caspase 3 1:500; MCL-1 1:200) and visualised with Liquid DAB (Agilent, UK). Ki67 (Agilent  
541 #M7240) staining was performed on a Dako Autostainer Link 48 using high pH TRS retrieval  
542 buffer performed in a PT module (20 mins at 97°C). Ki67 was applied at 1:100 dilution  
543 before visualising using Liquid DAB. For SOX2, IHC epitope retrieval was achieved by  
544 heating to 98°C in pH6 citrate buffer for 60 minutes before proceeding as per the  
545 manufacturer's instructions with SOX2 antibody used at a dilution of 1:500. Scanning and  
546 image analysis was conducted using Halo (Indica Labs). Algorithms were optimised for each  
547 stain individually and automated, quantitative analysis undertaken with Halo software (Indica  
548 Labs).  
549 For IF staining tissue slices were permeabilised and blocked in PBS with 10% NGS, 1%  
550 BSA, 0.3% TX-100 and 0.05% Azide for 1 hour at room temperature. After washes with 10%  
551 NGS, 1% BSA, 0.1% TX-100 and 0.05% Azide containing buffer slices were incubated with  
552 primary antibodies (NESTIN 1:300, GFAP 1:400, cl. Caspase 3 1:400) in washing buffer for  
553 72 hours at 4°C. After washes slices were incubated in secondary antibodies (1:200, Alexa  
554 Fluor 568 goat anti-mouse (#A11004), Alexa Fluor 488 goat anti-rabbit (#A11034), Life  
555 Technologies) in washing buffer for 24 hours. Following washes in PBS tissues were  
556 counterstained with DAPI (VECTASHIELD, LSBio) and mounted in gaskets (BioRad Seal  
557 Frame Incubation Chambers) on glass cover slips. Images were acquired using a Zeiss 710  
558 laser scanning microscope with an EC Plan-Neofluar 40x/1.30 Oil DIC M27 objective and

559 Zen 2.3 SP1 FP3 (black edition) software. 70µm Z-stacks were acquired at 2.5µm intervals  
560 and Maximum Intensity Projections (MIPs) were generated using Zen 2.1 (blue edition).  
561 Image processing was performed using Fiji (ImageJ 1.53c). Cleaved Caspase 3 positive  
562 cells were counted manually and nuclei were counted automatically using CellProfiler  
563 (Version 4.0.7).

564

#### 565 *In silico and transcriptomic analysis*

566 REMBRANDT microarray data was obtained from gliovis.bioinfo.cnio.es. Data was filtered  
567 for histology and tumour grading.

568 RNA sequencing data was obtained from a previously published GBM database (30). In  
569 order to determine the most differentially expressed genes, calculation of expression rank  
570 product was employed to assess relative gene expression in paired GSC and DIFF cell lines  
571 (56). Only results > 10 reads were incorporated.

572

#### 573 *Statistical analyses*

574 For comparison of two experimental groups two tailed, unpaired *t* test with Welch's  
575 correction (Welch's test) or Mann-Whitney test were used. For tumour related Kaplan–Meier  
576 survival curves Mantel-Cox (Log-rank) was plotted. All statistical analyses were executed  
577 with Prism software version 9 (GraphPad, La Jolla, CA, USA).

578

579

#### 580 **Acknowledgements**

581 First and foremost, our special gratitude goes to the GBM patients who agreed to make their  
582 tumour specimens available for research. Special thanks to Mary Fraser, Dr. Alexandru  
583 Stan, Dr. Zoltan Hanzely and the Neuropathology Department of the QUEH in Glasgow, who  
584 obtained patient consent and provided support with GBM tissue sampling. Further, we would  
585 like to thank the Core Services at the Cancer Research UK Beatson Institute with particular  
586 thanks to Gemma Thomson, David Strachan, the Biological Services Unit and Histology. We

587 thank Prof. Colin Watts for generous sharing of the patient-derived GBM cell lines, Prof.  
588 Steven Pollard and Rodrigo Gutierrez Quintana for providing the human astrocytes. Many  
589 thanks to Dr. Jayanthi Anand and Dr. Dimitris Athineos for their invaluable support with the  
590 animal work. Many thanks to members of the Tait laboratory for discussion and input, and  
591 Catherine Winchester for critical reading and assistance in the preparation of this  
592 manuscript. Figures were created with BioRender.com. **Funding:** This work was supported  
593 by CRUK core funding to the Beatson Institute (A17196) to C.N., (A17196/A31287) to  
594 N.R.P., (A22903) to K.M.R. and J.O'P., and (A18277) to J.C.N., a CRUK Programme  
595 Foundation Award (C40872/A20145) to S.W.T., CRUK Clinical Research Fellowship  
596 (A23220) to A.L.K., funding by the University of Glasgow to D.K. and A.J.C. and funding by  
597 the Beatson Cancer Charity and Cancer Research UK RadNet Centre Glasgow (A28803) to  
598 K.S.. L.M.-E. was funded by the by Erasmus+ Program and Short Research stay fellowship  
599 for trainees by Universitat Autònoma de Barcelona.

600

#### 601 **Author Contributions**

602 A.L.K. and S.W.G.T. conceived the study, designed the work plan and wrote the manuscript.  
603 A.L.K. performed the majority of the experiments. D.K., L.M.-E., J.O'P. and F.J.B. acquired  
604 data and provided technical support. N.R.P. performed IF imaging and analysis. D.K., K.S.,  
605 C.C., C.N. and G.M. provided assistance with the *in vivo* models and related imaging. K.K.  
606 and W.S. supervised and supported patient specimen collection. A.J.C. provided the  
607 RNAseq dataset. Y.E., D.K. and M.R.J. performed and supported data analysis. Expertise  
608 and critical input as well as review of the manuscript was given by K.J.C., G.I., K.B., A.J.C.,  
609 K.M.R. and J.C.N.

610

#### 611 **Competing interests**

612 K.J.C. is a recipient of a share in royalty payments paid to the Walter and Eliza Hall Institute  
613 of Medical Research in relation to venetoclax.

614

615



## 616 References

- 617 1. Louis DN, Perry A, Reifenberger G, von Deimling A, Figarella-Branger D, Cavenee  
618 WK, et al. The 2016 World Health Organization Classification of Tumors of the Central  
619 Nervous System: a summary. *Acta Neuropathol.* 2016;131(6):803-20.
- 620 2. Stupp R, Mason WP, van den Bent MJ, Weller M, Fisher B, Taphoorn MJ, et al.  
621 Radiotherapy plus concomitant and adjuvant temozolomide for glioblastoma. *N Engl J Med.*  
622 2005;352(10):987-96.
- 623 3. Ostrom QT, Cioffi G, Gittleman H, Patil N, Waite K, Kruchko C, et al. CBTRUS  
624 Statistical Report: Primary Brain and Other Central Nervous System Tumors Diagnosed in  
625 the United States in 2012–2016. *Neuro-Oncology.* 2019;21(Supplement\_5):v1-v100.
- 626 4. Weller M, Van Den Bent M, Preusser M, Le Rhun E, Tonn JC, Minniti G, et al. EANO  
627 guidelines on the diagnosis and treatment of diffuse gliomas of adulthood. *Nature Reviews*  
628 *Clinical Oncology.* 2020.
- 629 5. Chen J, McKay RM, Parada LF. Malignant glioma: lessons from genomics, mouse  
630 models, and stem cells. *Cell.* 2012;149(1):36-47.
- 631 6. Bao S, Wu Q, McLendon RE, Hao Y, Shi Q, Hjelmeland AB, et al. Glioma stem cells  
632 promote radioresistance by preferential activation of the DNA damage response. *Nature.*  
633 2006;444(7120):756-60.
- 634 7. Tait SW, Green DR. Mitochondrial regulation of cell death. *Cold Spring Harb*  
635 *Perspect Biol.* 2013;5(9).
- 636 8. Bock FJ, Tait SWG. Mitochondria as multifaceted regulators of cell death. *Nature*  
637 *Reviews Molecular Cell Biology.* 2020;21(2):85-100.
- 638 9. Campbell KJ, Tait SWG. Targeting BCL-2 regulated apoptosis in cancer. *Open Biol.*  
639 2018;8(5).
- 640 10. Montero J, Gstalder C, Kim DJ, Sadowicz D, Miles W, Manos M, et al. Destabilization  
641 of NOXA mRNA as a common resistance mechanism to targeted therapies. *Nature*  
642 *Communications.* 2019;10(1).
- 643 11. Chonghaile TN, Sarosiek KA, Vo TT, Ryan JA, Tammareddi A, Moore VDG, et al.  
644 Pretreatment Mitochondrial Priming Correlates with Clinical Response to Cytotoxic  
645 Chemotherapy. *Science.* 2011;334(6059):1129-33.
- 646 12. Souers AJ, Levenson JD, Boghaert ER, Ackler SL, Catron ND, Chen J, et al. ABT-  
647 199, a potent and selective BCL-2 inhibitor, achieves antitumor activity while sparing  
648 platelets. *Nature Medicine.* 2013;19(2):202-8.
- 649 13. Roberts AW, Davids MS, Pagel JM, Kahl BS, Puvvada SD, Gerecitano JF, et al.  
650 Targeting BCL2 with Venetoclax in Relapsed Chronic Lymphocytic Leukemia. *New England*  
651 *Journal of Medicine.* 2016;374(4):311-22.
- 652 14. Wei AH, Strickland SA, Jr., Hou JZ, Fiedler W, Lin TL, Walter RB, et al. Venetoclax  
653 Combined With Low-Dose Cytarabine for Previously Untreated Patients With Acute Myeloid  
654 Leukemia: Results From a Phase Ib/II Study. *J Clin Oncol.* 2019;37(15):1277-84.
- 655 15. Dinardo CD, Pratz KW, Lai A, Jonas BA, Wei AH, Thirman M, et al. Safety and  
656 preliminary efficacy of venetoclax with decitabine or azacitidine in elderly patients with  
657 previously untreated acute myeloid leukaemia: a non-randomised, open-label, phase 1b  
658 study. *The Lancet Oncology.* 2018;19(2):216-28.
- 659 16. Lok SW, Whittle JR, Vaillant F, Teh CE, Lo LL, Policheni AN, et al. A Phase Ib Dose-  
660 Escalation and Expansion Study of the BCL2 Inhibitor Venetoclax Combined with Tamoxifen  
661 in ER and BCL2-Positive Metastatic Breast Cancer. *Cancer Discovery.* 2019;9(3):354-69.
- 662 17. Nangia V, Siddiqui FM, Caenepeel S, Timonina D, Bilton SJ, Phan N, et al. Exploiting  
663 MCL1 Dependency with Combination MEK + MCL1 Inhibitors Leads to Induction of  
664 Apoptosis and Tumor Regression in KRAS-Mutant Non-Small Cell Lung Cancer. *Cancer*  
665 *Discovery.* 2018;8(12):1598-613.
- 666 18. Wroblewski D, Mijatov B, Mohana-Kumaran N, Lai F, Gallagher SJ, Haass NK, et al.  
667 The BH3-mimetic ABT-737 sensitizes human melanoma cells to apoptosis induced by  
668 selective BRAF inhibitors but does not reverse acquired resistance. 2013;34(2):237-47.

- 669 19. Serasinghe MN, Missert DJ, Ascioia JJ, Podgrabinska S, Wieder SY, Izadmehr S, et  
670 al. Anti-apoptotic BCL-2 proteins govern cellular outcome following B-RAFV600E inhibition  
671 and can be targeted to reduce resistance. *Oncogene*. 2015;34(7):857-67.
- 672 20. Karpel-Massler G, Ishida CT, Bianchetti E, Zhang Y, Shu C, Tsujiuchi T, et al.  
673 Induction of synthetic lethality in IDH1-mutated gliomas through inhibition of Bcl-xL. *Nat*  
674 *Commun*. 2017;8(1):1067.
- 675 21. Tagscherer KE, Fassl A, Sinkovic T, Combs SE, Roth W. p53-dependent regulation  
676 of Mcl-1 contributes to synergistic cell death by ionizing radiation and the Bcl-2/Bcl-XL  
677 inhibitor ABT-737. *Apoptosis*. 2012;17(2):187-99.
- 678 22. Karpel-Massler G, Ishida CT, Bianchetti E, Shu C, Perez-Lorenzo R, Horst B, et al.  
679 Inhibition of Mitochondrial Matrix Chaperones and Antiapoptotic Bcl-2 Family Proteins  
680 Empower Antitumor Therapeutic Responses. *Cancer Res*. 2017;77(13):3513-26.
- 681 23. Lathia JD, Mack SC, Mulkearns-Hubert EE, Valentim CLL, Rich JN. Cancer stem  
682 cells in glioblastoma. *Genes & Development*. 2015;29(12):1203-17.
- 683 24. Couturier CP, Ayyadhury S, Le PU, Nadaf J, Monlong J, Riva G, et al. Single-cell  
684 RNA-seq reveals that glioblastoma recapitulates a normal neurodevelopmental hierarchy.  
685 *Nature Communications*. 2020;11(1).
- 686 25. Reya T, Morrison SJ, Clarke MF, Weissman IL. Stem cells, cancer, and cancer stem  
687 cells. *Nature*. 2001;414(6859):105-11.
- 688 26. Fogarty LC, Flemmer RT, Geizer BA, Licursi M, Karunanithy A, Opferman JT, et al.  
689 Mcl-1 and Bcl-xL are essential for survival of the developing nervous system. *Cell Death &*  
690 *Differentiation*. 2019;26(8):1501-15.
- 691 27. Opferman JT, Kothari A. Anti-apoptotic BCL-2 family members in development. *Cell*  
692 *Death & Differentiation*. 2018;25(1):37-45.
- 693 28. Sarosiek KA, Fraser C, Muthalagu N, Bhola PD, Chang W, McBrayer SK, et al.  
694 Developmental Regulation of Mitochondrial Apoptosis by c-Myc Governs Age- and Tissue-  
695 Specific Sensitivity to Cancer Therapeutics. *Cancer Cell*. 2017;31(1):142-56.
- 696 29. Pollard SM, Yoshikawa K, Clarke ID, Danovi D, Stricker S, Russell R, et al. Glioma  
697 Stem Cell Lines Expanded in Adherent Culture Have Tumor-Specific Phenotypes and Are  
698 Suitable for Chemical and Genetic Screens. *Cell Stem Cell*. 2009;4(6):568-80.
- 699 30. Carruthers RD, Ahmed SU, Ramachandran S, Strathdee K, Kurian KM, Hedley A, et  
700 al. Replication Stress Drives Constitutive Activation of the DNA Damage Response and  
701 Radioresistance in Glioblastoma Stem-like Cells. *Cancer Research*. 2018;78(17):5060-71.
- 702 31. Levenson JD, Phillips DC, Mitten MJ, Boghaert ER, Diaz D, Tahir SK, et al. Exploiting  
703 selective BCL-2 family inhibitors to dissect cell survival dependencies and define improved  
704 strategies for cancer therapy. *Sci Transl Med*. 2015;7(279):279ra40.
- 705 32. Kotschy A, Szlavik Z, Murray J, Davidson J, Maragno AL, Le Toumelin-Braizat G, et  
706 al. The MCL1 inhibitor S63845 is tolerable and effective in diverse cancer models. *Nature*.  
707 2016;538(7626):477-82.
- 708 33. Hemmati HD, Nakano I, Lazareff JA, Masterman-Smith M, Geschwind DH, Bronner-  
709 Fraser M, et al. Cancerous stem cells can arise from pediatric brain tumors. *Proceedings of*  
710 *the National Academy of Sciences*. 2003;100(25):15178-83.
- 711 34. Sofroniew MV, Vinters HV. Astrocytes: biology and pathology. *Acta*  
712 *Neuropathologica*. 2010;119(1):7-35.
- 713 35. Fanfone D, Idbaih A, Mammi J, Gabut M, Ichim G. Profiling Anti-Apoptotic BCL-xL  
714 Protein Expression in Glioblastoma Tumorspheres. *Cancers*. 2020;12(10):2853.
- 715 36. Koessinger AL, Koessinger D, Stevenson K, Cloix C, Mitchell L, Nixon C, et al.  
716 Quantitative in vivo bioluminescence imaging of orthotopic patient-derived glioblastoma  
717 xenografts. *Scientific Reports*. 2020;10(1).
- 718 37. Weller M, van den Bent M, Tonn JC, Stupp R, Preusser M, Cohen-Jonathan-Moyal  
719 E, et al. European Association for Neuro-Oncology (EANO) guideline on the diagnosis and  
720 treatment of adult astrocytic and oligodendroglial gliomas. *Lancet Oncol*. 2017;18(6):e315-  
721 e29.

- 722 38. Ahmed SU, Carruthers R, Gilmour L, Yildirim S, Watts C, Chalmers AJ. Selective  
723 Inhibition of Parallel DNA Damage Response Pathways Optimizes Radiosensitization of  
724 Glioblastoma Stem-like Cells. *Cancer Res.* 2015;75(20):4416-28.
- 725 39. Auffinger B, Tobias AL, Han Y, Lee G, Guo D, Dey M, et al. Conversion of  
726 differentiated cancer cells into cancer stem-like cells in a glioblastoma model after primary  
727 chemotherapy. *Cell Death & Differentiation.* 2014;21(7):1119-31.
- 728 40. Sidney LE, Branch MJ, Dunphy SE, Dua HS, Hopkinson A. Concise Review:  
729 Evidence for CD34 as a Common Marker for Diverse Progenitors. *STEM CELLS.*  
730 2014;32(6):1380-9.
- 731 41. Park H, Poo M-M. Neurotrophin regulation of neural circuit development and  
732 function. *Nature Reviews Neuroscience.* 2013;14(1):7-23.
- 733 42. Wang X, Prager BC, Wu Q, Kim LJY, Gimple RC, Shi Y, et al. Reciprocal Signaling  
734 between Glioblastoma Stem Cells and Differentiated Tumor Cells Promotes Malignant  
735 Progression. *Cell Stem Cell.* 2018;22(4):514-28.e5.
- 736 43. Minichiello L. TrkB signalling pathways in LTP and learning. *Nature Reviews*  
737 *Neuroscience.* 2009;10(12):850-60.
- 738 44. Weeden CE, Ah-Cann C, Holik AZ, Pasquet J, Garnier JM, Merino D, et al. Dual  
739 inhibition of BCL-XL and MCL-1 is required to induce tumour regression in lung squamous  
740 cell carcinomas sensitive to FGFR inhibition. *Oncogene.* 2018;37(32):4475-88.
- 741 45. Oberoi RK, Parrish KE, Sio TT, Mittapalli RK, Elmquist WF, Sarkaria JN. Strategies  
742 to improve delivery of anticancer drugs across the blood–brain barrier to treat glioblastoma.  
743 *Neuro-Oncology.* 2016;18(1):27-36.
- 744 46. Adams JM, Cory S. The BCL-2 arbiters of apoptosis and their growing role as cancer  
745 targets. *Cell Death & Differentiation.* 2018;25(1):27-36.
- 746 47. Shang E, Nguyen TTT, Shu C, Westhoff M-A, Karpel-Massler G, Siegelin MD.  
747 Epigenetic Targeting of Mcl-1 Is Synthetically Lethal with Bcl-xL/Bcl-2 Inhibition in Model  
748 Systems of Glioblastoma. *Cancers.* 2020;12(8):2137.
- 749 48. Ni J, Xie S, Ramkissoon SH, Luu V, Sun Y, Bandopadhyay P, et al. Tyrosine  
750 receptor kinase B is a drug target in astrocytomas. *Neuro-Oncology.* 2017;19(1):22-30.
- 751 49. Del Gaizo Moore V, Brown JR, Certo M, Love TM, Novina CD, Letai A. Chronic  
752 lymphocytic leukemia requires BCL2 to sequester prodeath BIM, explaining sensitivity to  
753 BCL2 antagonist ABT-737. *Journal of Clinical Investigation.* 2007;117(1):112-21.
- 754 50. Del Gaizo Moore V, Schlis KD, Sallan SE, Armstrong SA, Letai A. BCL-2  
755 dependence and ABT-737 sensitivity in acute lymphoblastic leukemia. *Blood.*  
756 2008;111(4):2300-9.
- 757 51. Mérimo D, Khaw SL, Glaser SP, Anderson DJ, Belmont LD, Wong C, et al. Bcl-2, Bcl-  
758 x(L), and Bcl-w are not equivalent targets of ABT-737 and navitoclax (ABT-263) in lymphoid  
759 and leukemic cells. *Blood.* 2012;119(24):5807-16.
- 760 52. Fael Al-Mayhani TM, Ball SL, Zhao JW, Fawcett J, Ichimura K, Collins PV, et al. An  
761 efficient method for derivation and propagation of glioblastoma cell lines that conserves the  
762 molecular profile of their original tumours. *J Neurosci Methods.* 2009;176(2):192-9.
- 763 53. Carruthers R, Ahmed SU, Strathdee K, Gomez-Roman N, Amoah-Buahin E, Watts  
764 C, et al. Abrogation of radioresistance in glioblastoma stem-like cells by inhibition of ATM  
765 kinase. *Molecular Oncology.* 2015;9(1):192-203.
- 766 54. Pollard SM. *In Vitro Expansion of Fetal Neural Progenitors as Adherent Cell Lines.*  
767 Humana Press; 2013. p. 13-24.
- 768 55. Lopez J, Bessou M, Riley JS, Giampazolias E, Todt F, Rochegue T, et al. Mito-  
769 priming as a method to engineer Bcl-2 addiction. *Nat Commun.* 2016;7:10538.
- 770 56. Breitling R, Armengaud P, Amtmann A, Herzyk P. Rank products: a simple, yet  
771 powerful, new method to detect differentially regulated genes in replicated microarray  
772 experiments. *FEBS Letters.* 2004;573(1-3):83-92.
- 773  
774

775 **Figure legends**

776 **Figure 1. High anti-apoptotic BCL-2 family protein expression correlates with**

777 **increased BH3-mimetic sensitivity in GBM**

778 (A) Schematic overview of BH3-mimetic drugs used and their respective targets (B) Panel of  
779 six GSC cell lines and the human primary GBM cell line U87MG were treated with indicated  
780 drugs for 24 to 48 hours and analysed for cell viability using an IncuCyte imager and SYTOX  
781 Green exclusion. Results are presented as heatmap. Percentage cell death was calculated  
782 by normalising against maximal cell death (treatment with 1 $\mu$ M Actinomycin D, 10 $\mu$ M ABT-  
783 737 and 1 $\mu$ M S6384), n=3 independent experiments per cell line. (C) Immunoblot of BCL-2  
784 family proteins, cell-line specific neural stem cell marker SOX2 and astrocyte lineage  
785 differentiation marker GFAP in human astrocytes and patient-derived GSC.  $\alpha$ -tubulin served  
786 as loading control. Representative image from n=3 independent experiments. (D,E) Matched  
787 tumour and margin specimens were obtained from three patients diagnosed with GBM and  
788 stained for haematoxylin and eosin (H&E), BCL-xL and MCL-1 IHC (representative images  
789 of one case shown). H-score (analysis of intracellular BCL-xL and MCL-1 expression) was  
790 determined using automated analysis with Halo. Error bars represent mean +/-SD  
791 (\*\*p=0.0002, \*p=0.0404) Welch's test. Further representative images in lower  
792 magnifications are shown in Supplementary Figure 1C.

793

794 **Figure 2. Anti-apoptotic MCL-1 is required for the growth and survival of GBM**

795 (A) Representative images of neurosphere growth from G7 GSC vector<sup>CRISPR</sup> (upper panel),  
796 MCL-1.1<sup>CRISPR</sup> (middle panel) MCL-1.2<sup>CRISPR</sup> (lower panel), respectively. Quantification of  
797 neurosphere formation capacity by G7 GSC vector<sup>CRISPR</sup> vs. MCL-1.1<sup>CRISPR</sup> or MCL-1.2<sup>CRISPR</sup>.  
798 Error bars represent mean +/-SD from n=4 independent experiments (p=0.8146, ns,  
799 nonsignificant) Welch's test. (B) Representative images of brain MRI scans (tumour  
800 indicated by red dashed line) next to corresponding pseudocolour representations of iRFP  
801 signal of mice bearing iRFP tagged G7 GSC vector<sup>CRISPR</sup> (upper panel) and MCL-1.2<sup>CRISPR</sup>  
802 (lower panel) xenografts, respectively. iRFP signal was detected by PEARL scans (700nm

803 channel) (1) at week 8 and (2) at week 20 (vector<sup>CRISPR</sup>) or week 36 (MCL1<sup>CRISPR</sup>) post  
804 injection. **(C)** Quantification of time to 20% iRFP signal increase of G7 vector<sup>CRISPR</sup> n=13 vs.  
805 G7 MCL-1<sup>CRISPR</sup> tumours n=19, compared to 4 weeks post injection (baseline signal). Error  
806 bars represent mean +/-SD (\*\*p=0.0013) Mann-Whitney test. **(D)** Kaplan-Meier survival  
807 graph of mice with orthotopic xenografts of G7 GSC iRFP vector<sup>CRISPR</sup> n=9 (median survival  
808 87 days) vs. MCL-1<sup>CRISPR</sup> tumours n=10 (median survival undefined) post tumour cell  
809 implantation (p<0.0001) Log-rank (Mantel-Cox) test.

810

811 **Figure 3. GSC display increased apoptotic priming and can be effectively killed by**  
812 **dual BCL-xL, MCL-1 inhibition**

813 **(A)** G7 and E2 GSC were treated with DMSO (ctrl), A-1331852 or ABT-737 as indicated for  
814 16 or 24 hours, respectively, harvested and protein expression was analysed by  
815 immunoblot.  $\alpha$ -tubulin served as loading control. Representative image from n=3  
816 independent experiments shown. **(B)** G7 or R24 GSC vector<sup>CRISPR</sup> vs. MCL1.1<sup>CRISPR</sup> and  
817 MCL1.2<sup>CRISPR</sup> were treated with A-1331852 for 24 hours and analysed for cell viability using  
818 an IncuCyte imager and SYTOX Green exclusion. Percentage cell death was calculated by  
819 normalising against maximal cell death verified by visual inspection. Error bars represent  
820 mean +/-SEM from n=3 independent experiments. (G7: \*p=0.0218, \*\*p=0.002, \*\*\*p=0.0006)  
821 (R24: \*\*p=0.0028, \*\*\*\*p<0.0001) Welch's test. **(C)** E2, G1, G7, R24 GSC were treated with a  
822 combination of A-1331852 and S63845 in indicated concentrations for 24 hours and  
823 analysed for cell viability using an IncuCyte imager and SYTOX Green exclusion.  
824 Percentage cell death was calculated by normalising against maximal cell death as  
825 described in Figure 1B. Error bars represent mean +/-SEM from n=3 independent  
826 experiments. (E2 \*\*p=0.0021, G1 \*\*p=0.0022, G7 \*\*p=0.0016, R24 \*p=0.0123) Welch's test.  
827 **(D)** Clonogenic survival assay of G7 GSC iRFP treated with indicated drugs 16 hours after  
828 plating 250 cells per well. Colonies counted manually after 14 days. Error bars represent  
829 mean +/-SD from n=3 independent experiments (\*\*p=0.0038) Welch's test. Representative  
830 images of a replicate in one independent repeat scanned on LICOR imager. **(E)** E2 GSC

831 vector<sup>CRISPR</sup> and BAK/BAX<sup>CRISPR</sup> were treated as indicated for 2 hours, harvested and protein  
832 expression was analysed by immunoblot. HSP60 served as loading control. Representative  
833 image from n=3 independent experiments. (F) E2 and R15 GSC and paired DIFF cells were  
834 treated either with DMSO (grey) or a combination of A-1331852 and S63845 (both 0.1  $\mu$ M)  
835 for 24 hours and analysed for cell viability using an IncuCyte imager and SYTOX Green  
836 exclusion. Error bars represent mean  $\pm$  SEM from n=3 independent experiments.  
837 Representative IncuCyte images 24 hours after treatment are shown.

838

839 **Figure 4. TrkB signalling regulates sensitivity of GSC to anti-apoptotic treatment**

840 (A) Most differentially expressed genes in RNAseq analysis of E2 and G7 GSC vs. E2 and  
841 G7 DIFF. *NTRK2* codes for TrkB. (B) Immunoblot of TrkB in E2 and G7 GSC compared with  
842 paired DIFF cells.  $\alpha$ -tubulin served as loading control. Representative image from n=2  
843 independent experiments. (C) E2 and G7 and GSC treated with BDNF (100ng/mL) or 7,8-  
844 DHF (20 $\mu$ g/mL)  $\pm$  A-1331852 1 $\mu$ M and S63845 1 $\mu$ M for 24 hours (after a 24-hour  
845 starvation period in 1% glutamine containing DMEM/F12) and analysed for cell viability using  
846 an IncuCyte imager and SYTOX Green exclusion. Error bars represent mean  $\pm$  SEM from  
847 one of n=3 independent experiments (E2 \*p=0.0166, G7 \*\*\*p=0.008) Welch's test. (D) G7  
848 DIFF treated as described in Figure 4C and analysed for cell viability using an IncuCyte  
849 imager and SYTOX Green exclusion. Error bars represent mean  $\pm$  SEM from n=3  
850 independent experiments (ns, p=0.9284). (E) G7 GSC were treated with 7,8-DHF (20 $\mu$ g/mL)  
851  $\pm$  A-1331852 1 $\mu$ M and S63845 1 $\mu$ M for 1 hour, harvested and protein expression was  
852 analysed by immunoblot.  $\alpha$ -tubulin served as loading control. Representative image from  
853 n=3 independent experiments.

854

855 **Figure 5. Combined BCL-xL and MCL-1 inhibition causes apoptosis in human GBM ex**

856 **vivo**

857 (A-C) Representative images of H&E, Ki67 and cleaved Caspase 3 IHC of three patients  
858 diagnosed with *IDHwt* GBM (case 1-3; ctrl=DMSO, dual treatment=A-1331852 1 $\mu$ M +  
859 S63845 1 $\mu$ M) (D-F) Quantification of cellularity, percentage Ki67 and SOX2 positive  
860 cells/total cell count in all three cases treated with the drugs described in (A-C) for 72 hours.  
861 Error bars represent mean +/-SEM (\*\*p=0.0021) Welch's test. (G) Representative images of  
862 IF staining of GFAP, NESTIN (both red) and cleaved Caspase 3 (green) in the  
863 subventricular zone (SVZ) of mouse brain slices, cultured and treated with DMSO or a  
864 combination of ABT-263 5 $\mu$ M and S63845 2 $\mu$ M for 24 hours, counterstaining with DAPI  
865 (blue). (H) Quantification of cleaved Caspase 3 positive cells normalised to nuclear count in  
866 single mice. Single dots represent analysed images. Error bars represent median (mouse 1:  
867 p=0.9198, p=0.3086; mouse 2: p=0.149, p=0.2974; mouse 3: \*\*p=0.0044, p=0.0593; ns,  
868 nonsignificant) Welch's test. Scale bars = 50 $\mu$ m.

869

870 **Figure 6. Priming with BCL-xL inhibition renders GSC vulnerable to MCL-1 inhibition,**  
871 **promoting tumour regression *in vivo***

872 (A) E2 GSC vector<sup>CRISPR</sup> and BAK/BAX<sup>CRISPR</sup> were treated with DMSO (-), A-1331852 and  
873 S63845 as indicated for 24 hours, harvested and protein expression was analysed by  
874 immunoblot. Representative image from n=2 independent experiments.  $\beta$ -tubulin served as  
875 loading control. (B) Direct binding interactions between MCL-1 and BIM were  
876 immunoprecipitated and interacting proteins were detected by western blot in G7 GSC  
877 treated for 16 hours with A-1331852 (Input=total cell lysate, IP=immunoprecipitated fraction).  
878 Representative image from n=2 independent experiments. (C) G7 GSC were treated with  
879 DMSO, A-1331852 or S63852 1 $\mu$ M for 48 hours, followed by 24 hours drug washout with  
880 exchange to fresh medium and treatment with indicated drugs for 24 hours. For cell viability  
881 analysis, IncuCyte imager and SYTOX Green exclusion was used. Error bars represent  
882 mean +/-SEM from n=3 independent experiments, (\*\*p=0.003) Welch's test. (D) E2 GSC  
883 were pre-treated with DMSO or A-1331852 1 $\mu$ M (#) for 24 hours, followed by 24 hours drug

884 washout with exchange to fresh medium and treatment with indicated drugs for 48 hours.  
885 For cell viability analysis, IncuCyte imager and SYTOX Green exclusion was used. Error  
886 bars represent mean +/-SEM from n=3 independent experiments, (\*\*p=0.0004) Welch's  
887 test. **(E)** G7 GSC vector<sup>CRISPR</sup> and BIM<sup>CRISPR</sup> were treated for 48 hours with A-1331852 1µM,  
888 followed by 24 hours drug washout with exchange to fresh medium and treatment with  
889 S63845 1µM for 24 hours. For cell viability analysis, IncuCyte imager and SYTOX Green  
890 exclusion was used. Error bars represent mean +/-SEM from n=3 independent experiments,  
891 (\*p=0.0132) Welch's test. **(F)** Percent U87MG subcutaneous tumour volume change at the  
892 end of 2 weeks alternating treatment with ABT-263, followed by S63845, relative to tumour  
893 size at start. Treatment commenced when tumours were >5mm diameter. n=6 vehicle  
894 treated (grey dots) and n=7 drug treated (blue dots). Bars are mean +/- SD (\*p=0.0104)  
895 Welch's test. **(G)** Kaplan-Meier survival analysis of U87 vehicle treated (grey line, n=6,  
896 median survival 22 days) vs. U87 drug treated (blue line, n=7, median survival 34 days)  
897 since treatment start (\*\*p=0.0056) Log-rank (Mantel-Cox) test.  
898



A

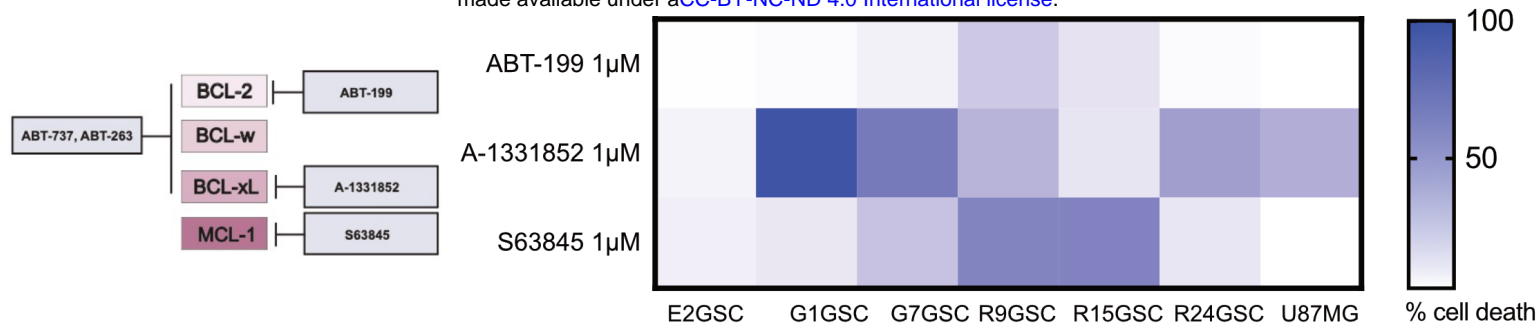

C

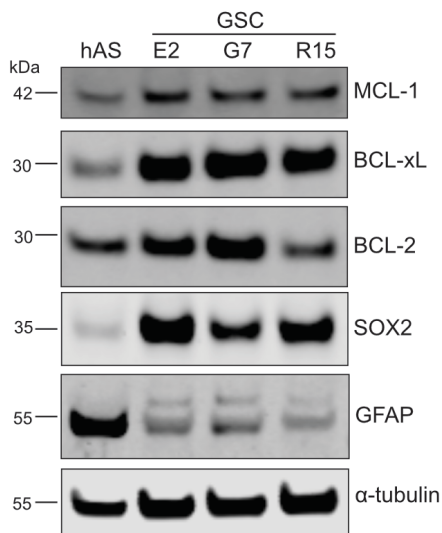

E

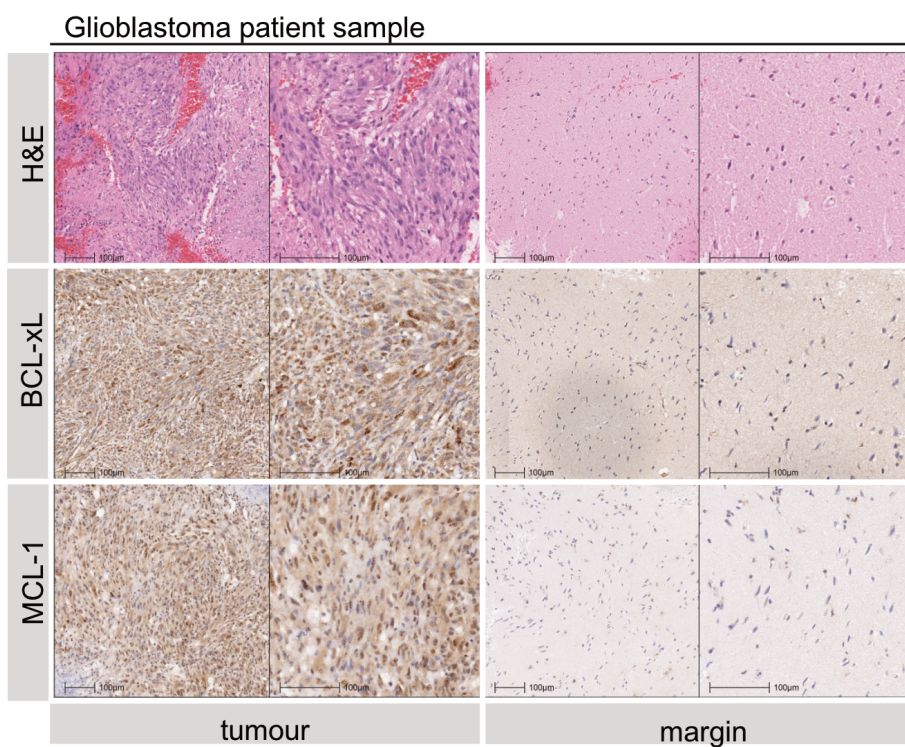

D

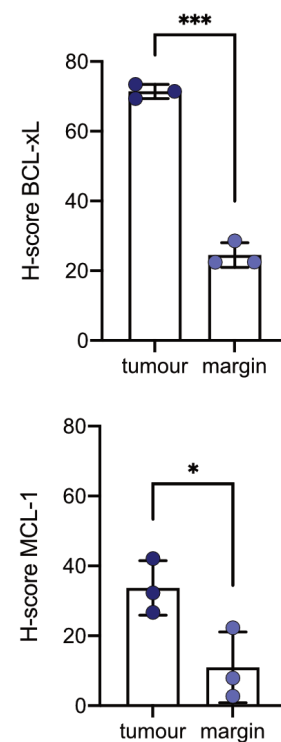

Figure 1

A

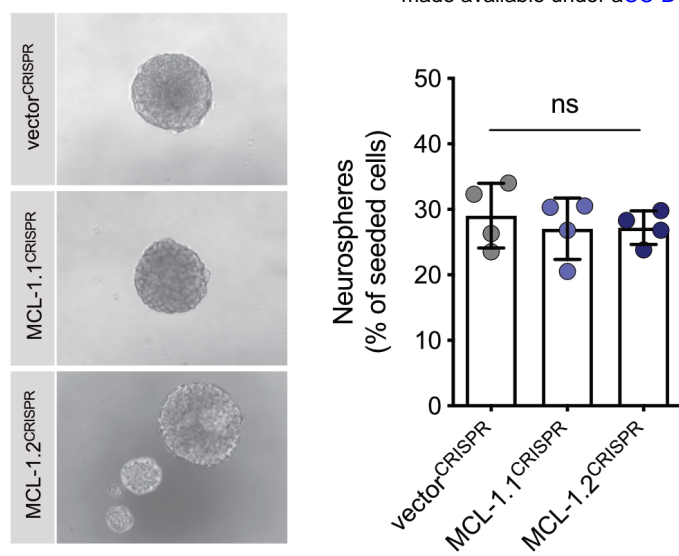

B

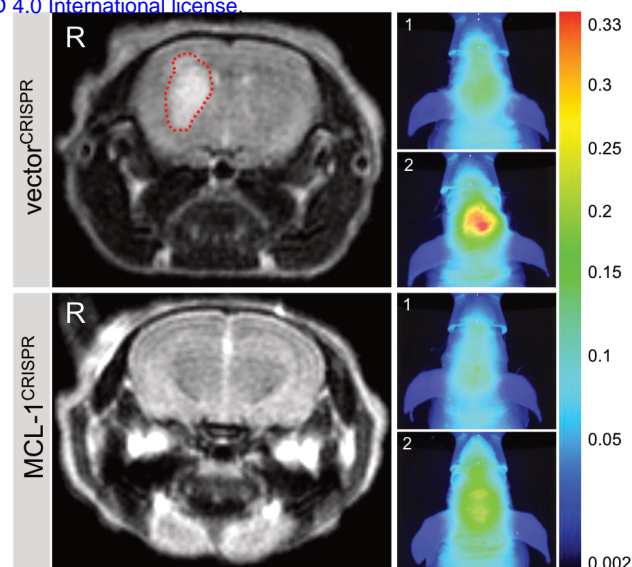

C

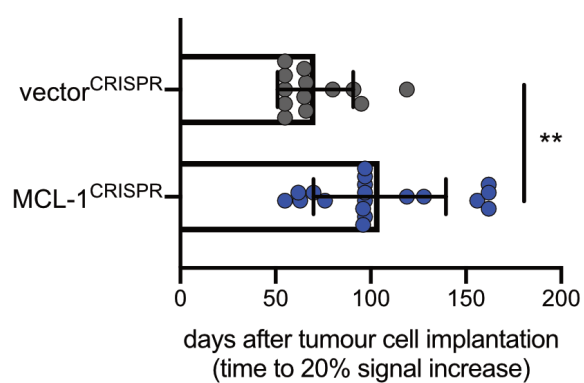

D

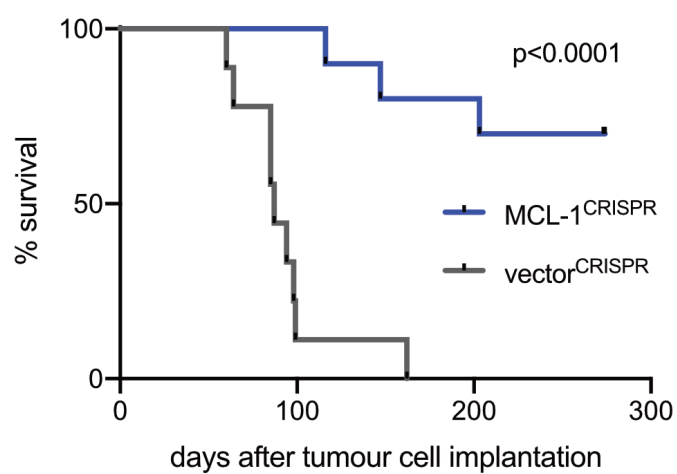

Figure 2

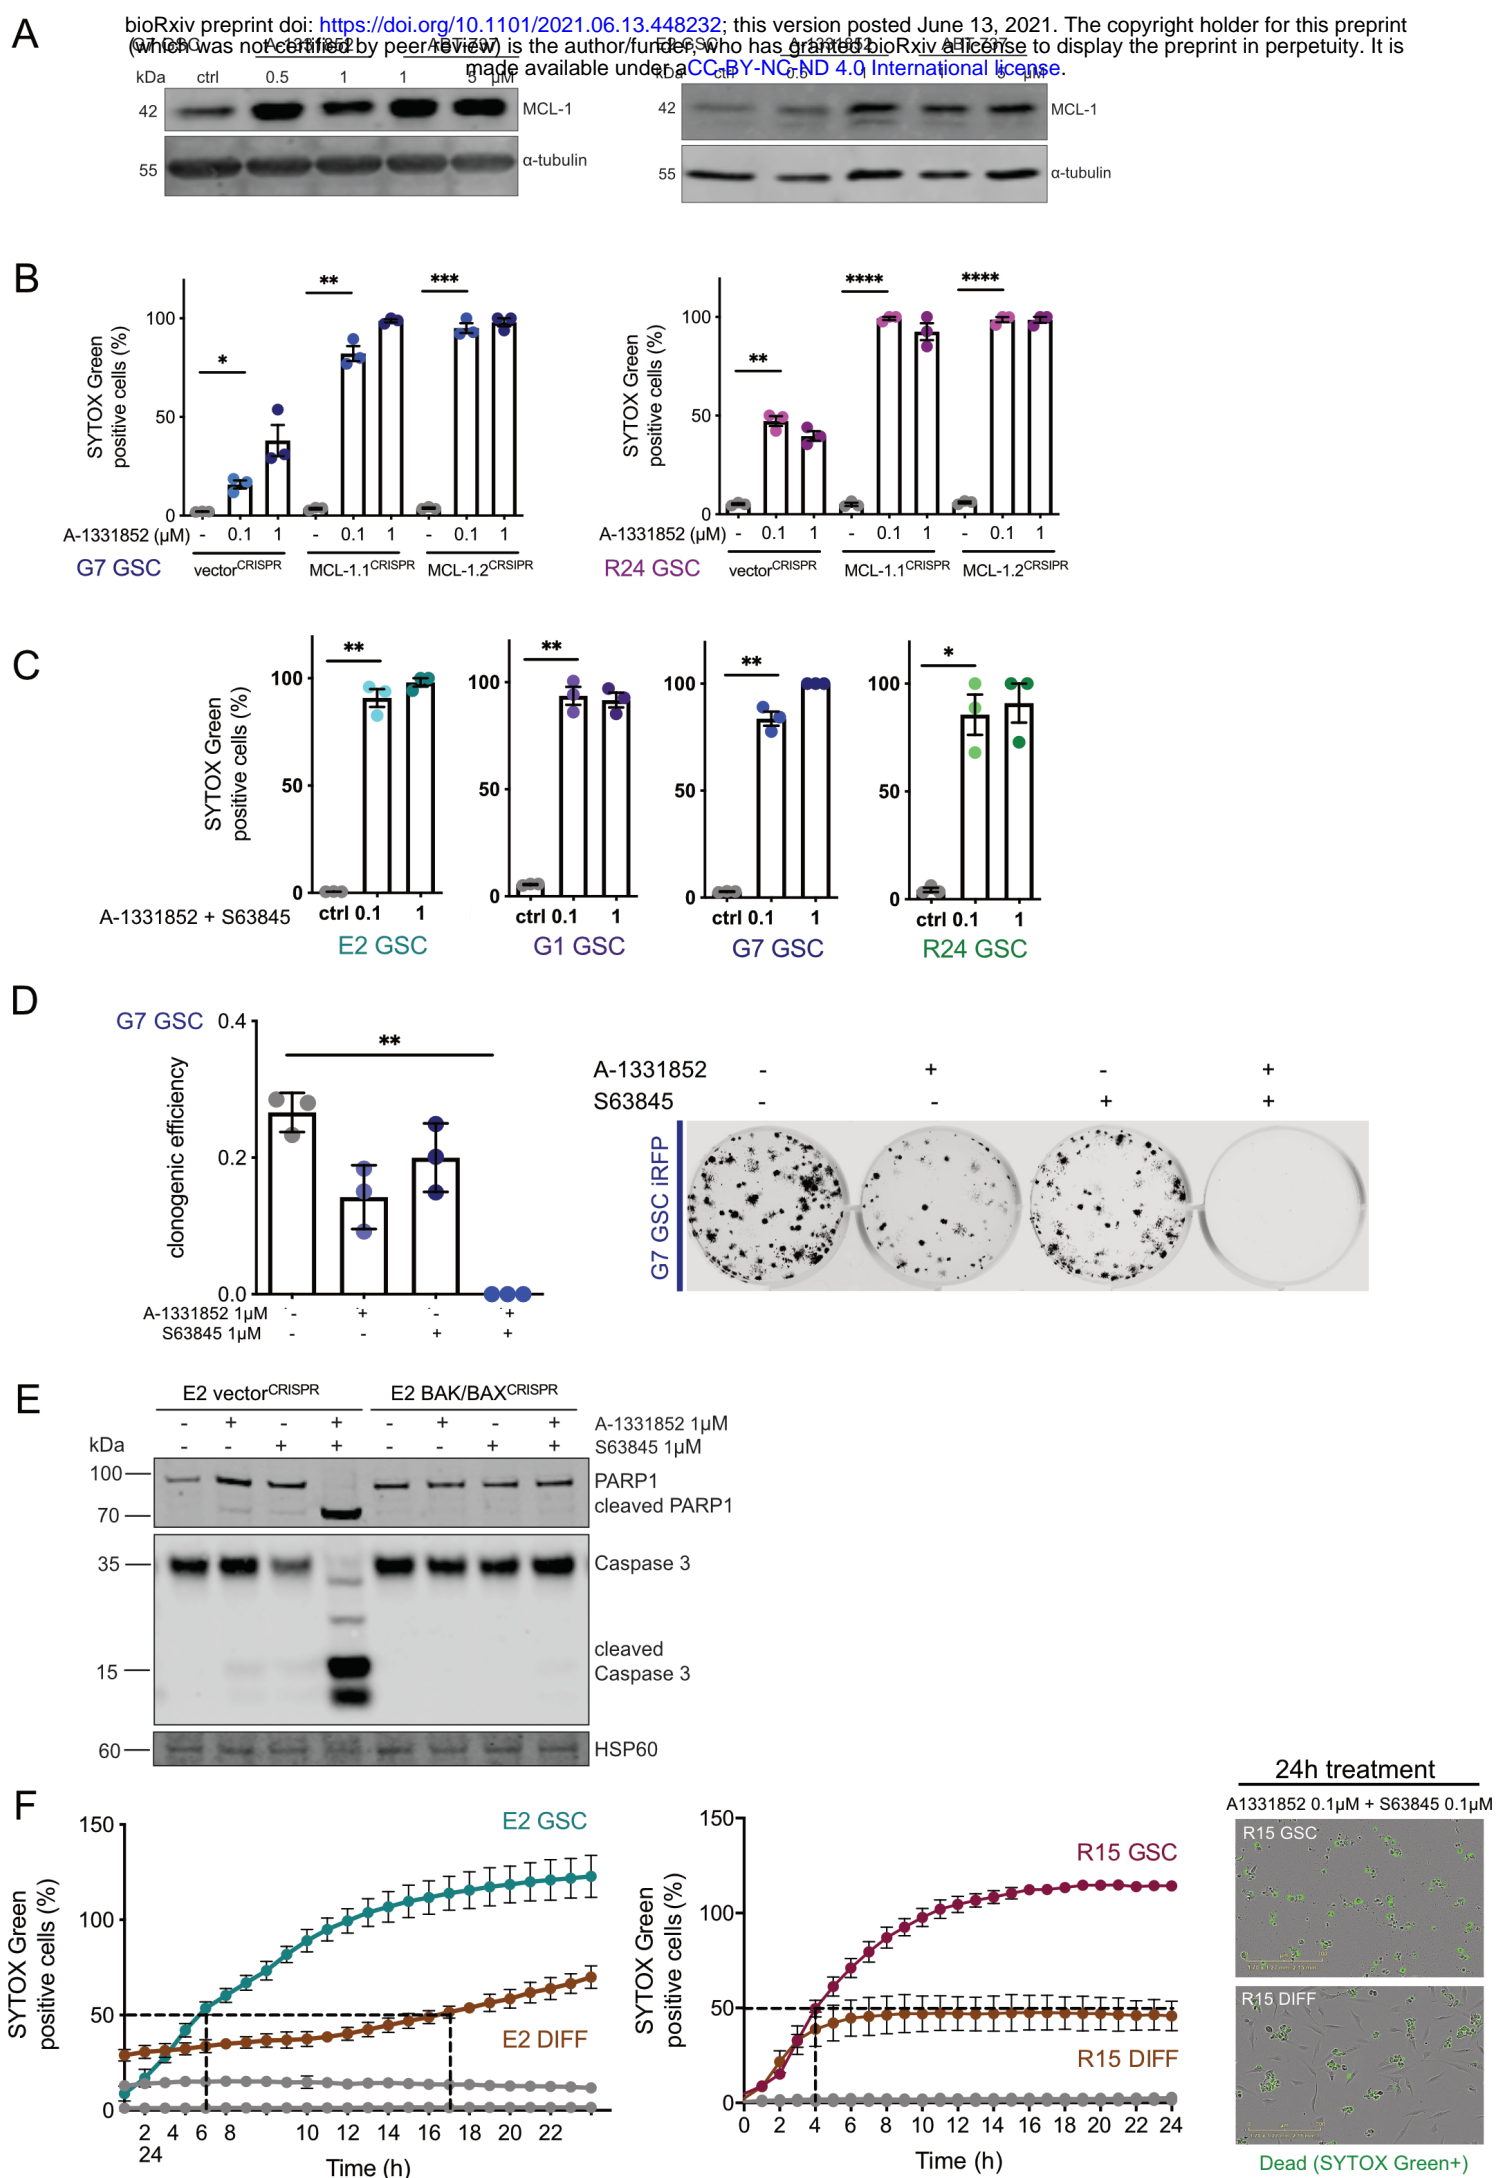

**Figure 3**

**A**

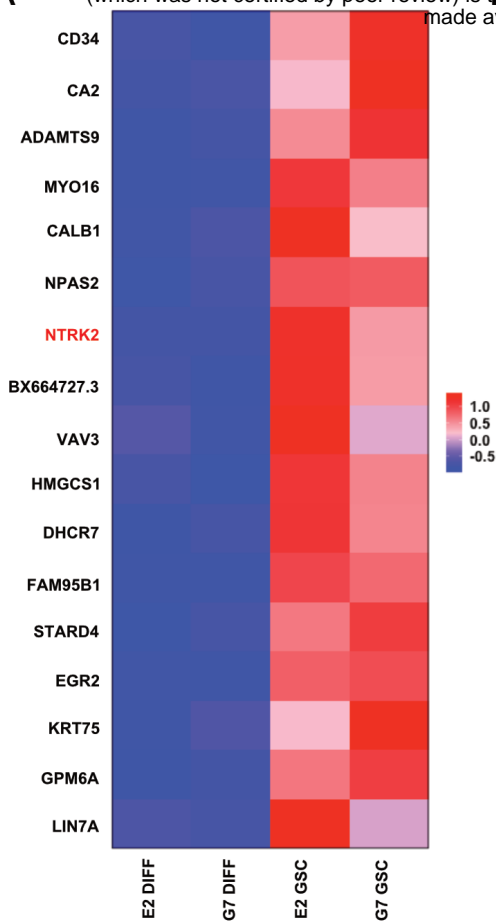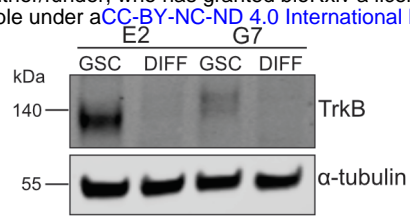

**C**

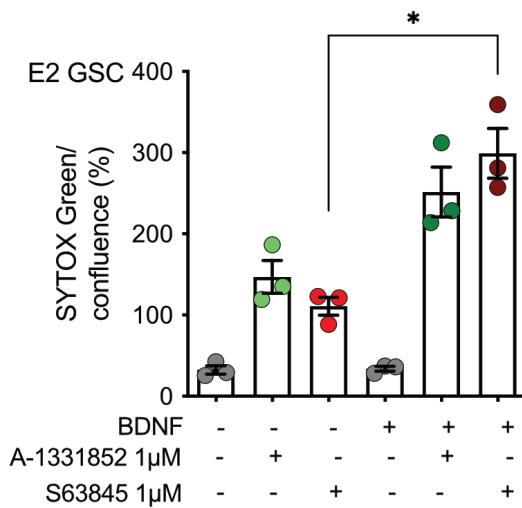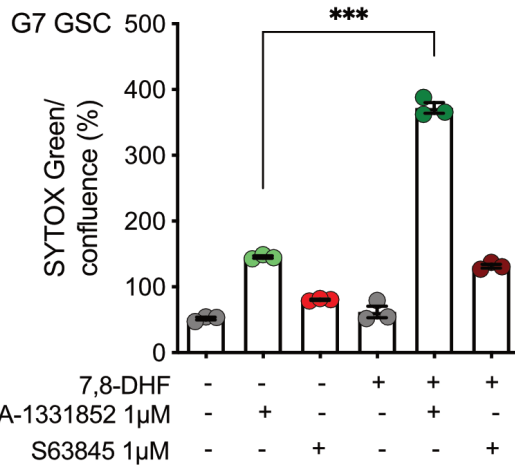

**D**

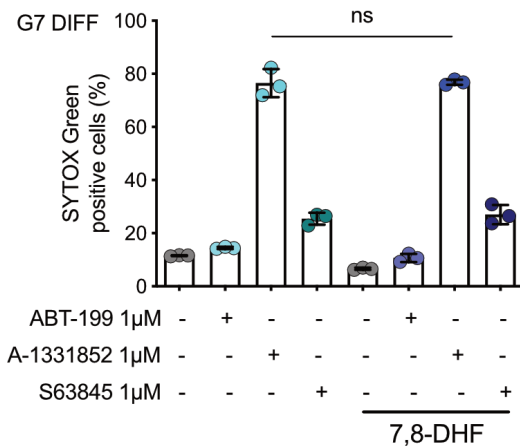

**E**

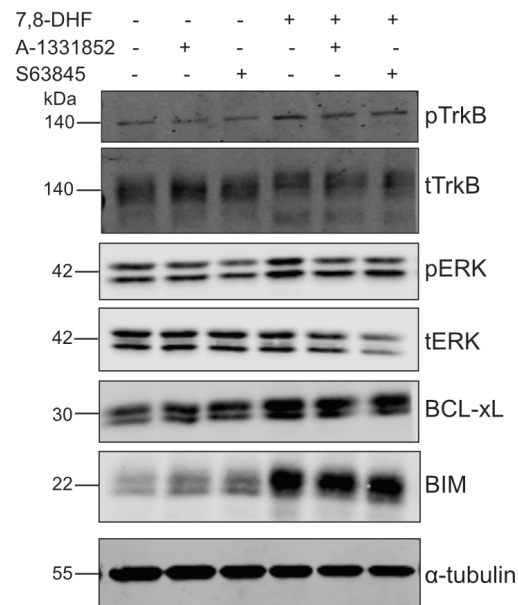

**Figure 4**

**A** Case 1: male, 50y, GBM WHO<sup>IV</sup>, IDHwt, MGMT-methylated

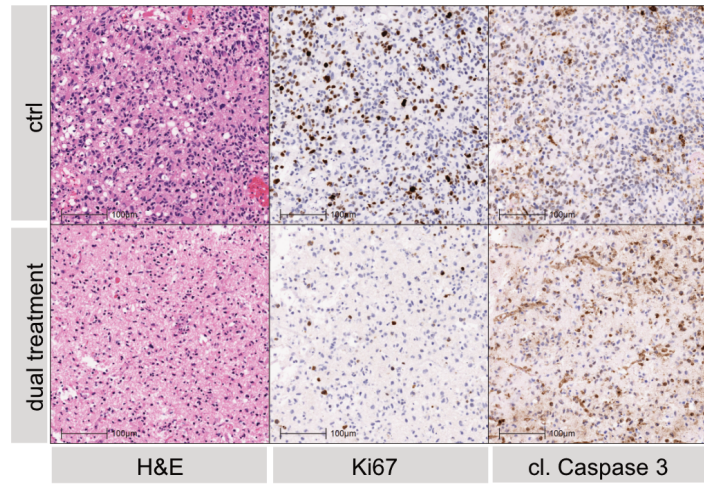

**B** Case 2: male, 60y, GBM WHO<sup>IV</sup>, IDHwt, MGMT-unmethylated

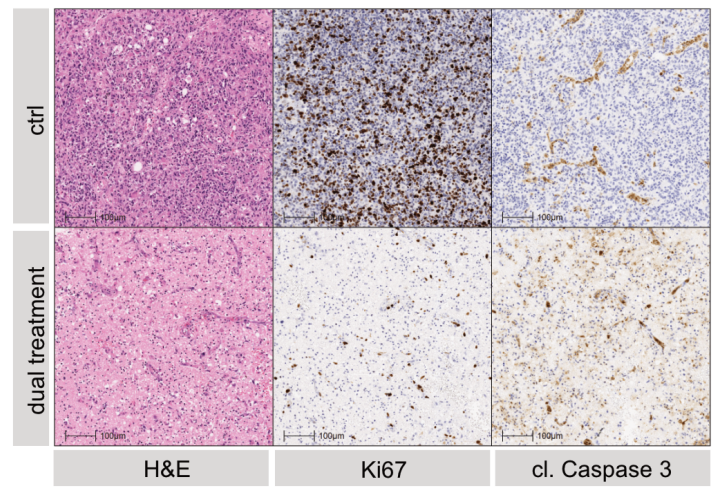

**C** Case 3: female, 47y, GBM WHO<sup>IV</sup>, IDHwt, MGMT-methylated

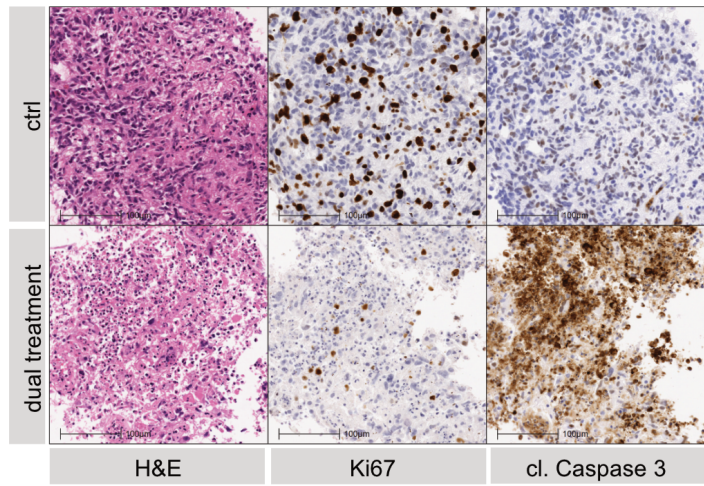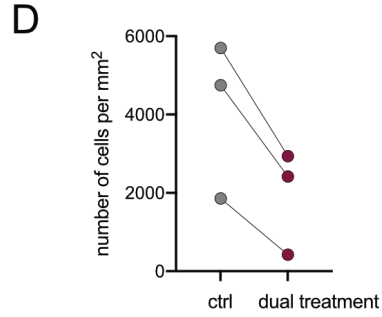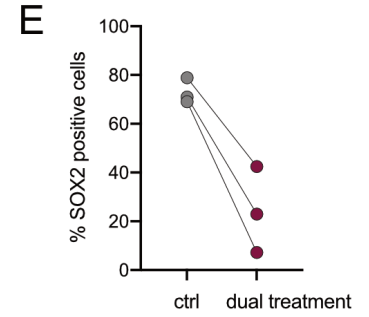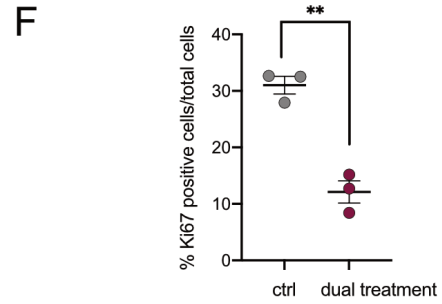

**G** DMSO + ABT-263 and S63845

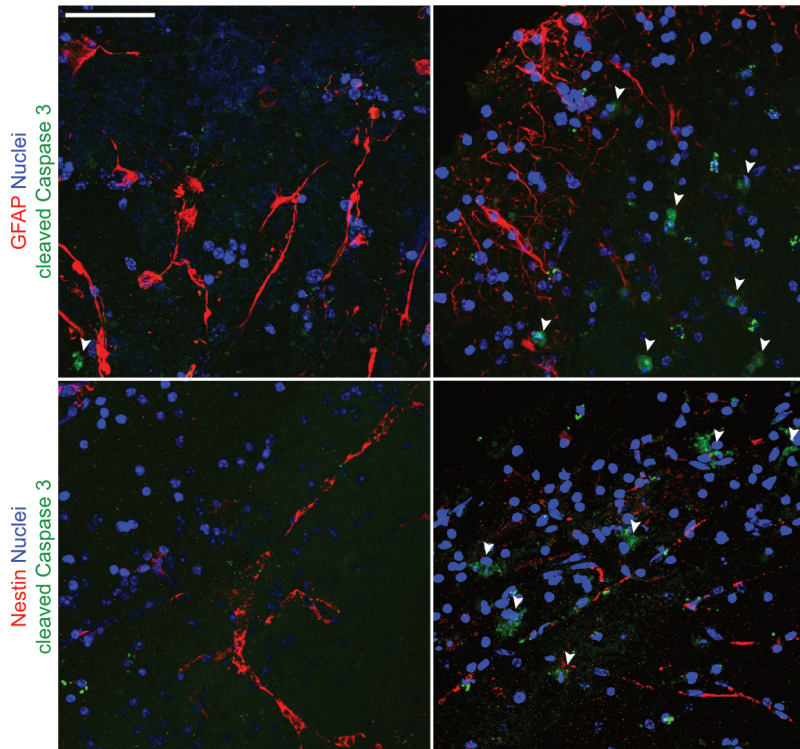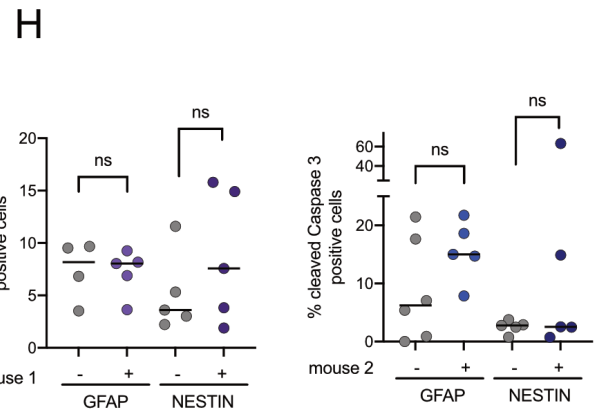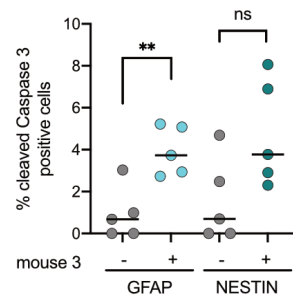

**Figure 5**

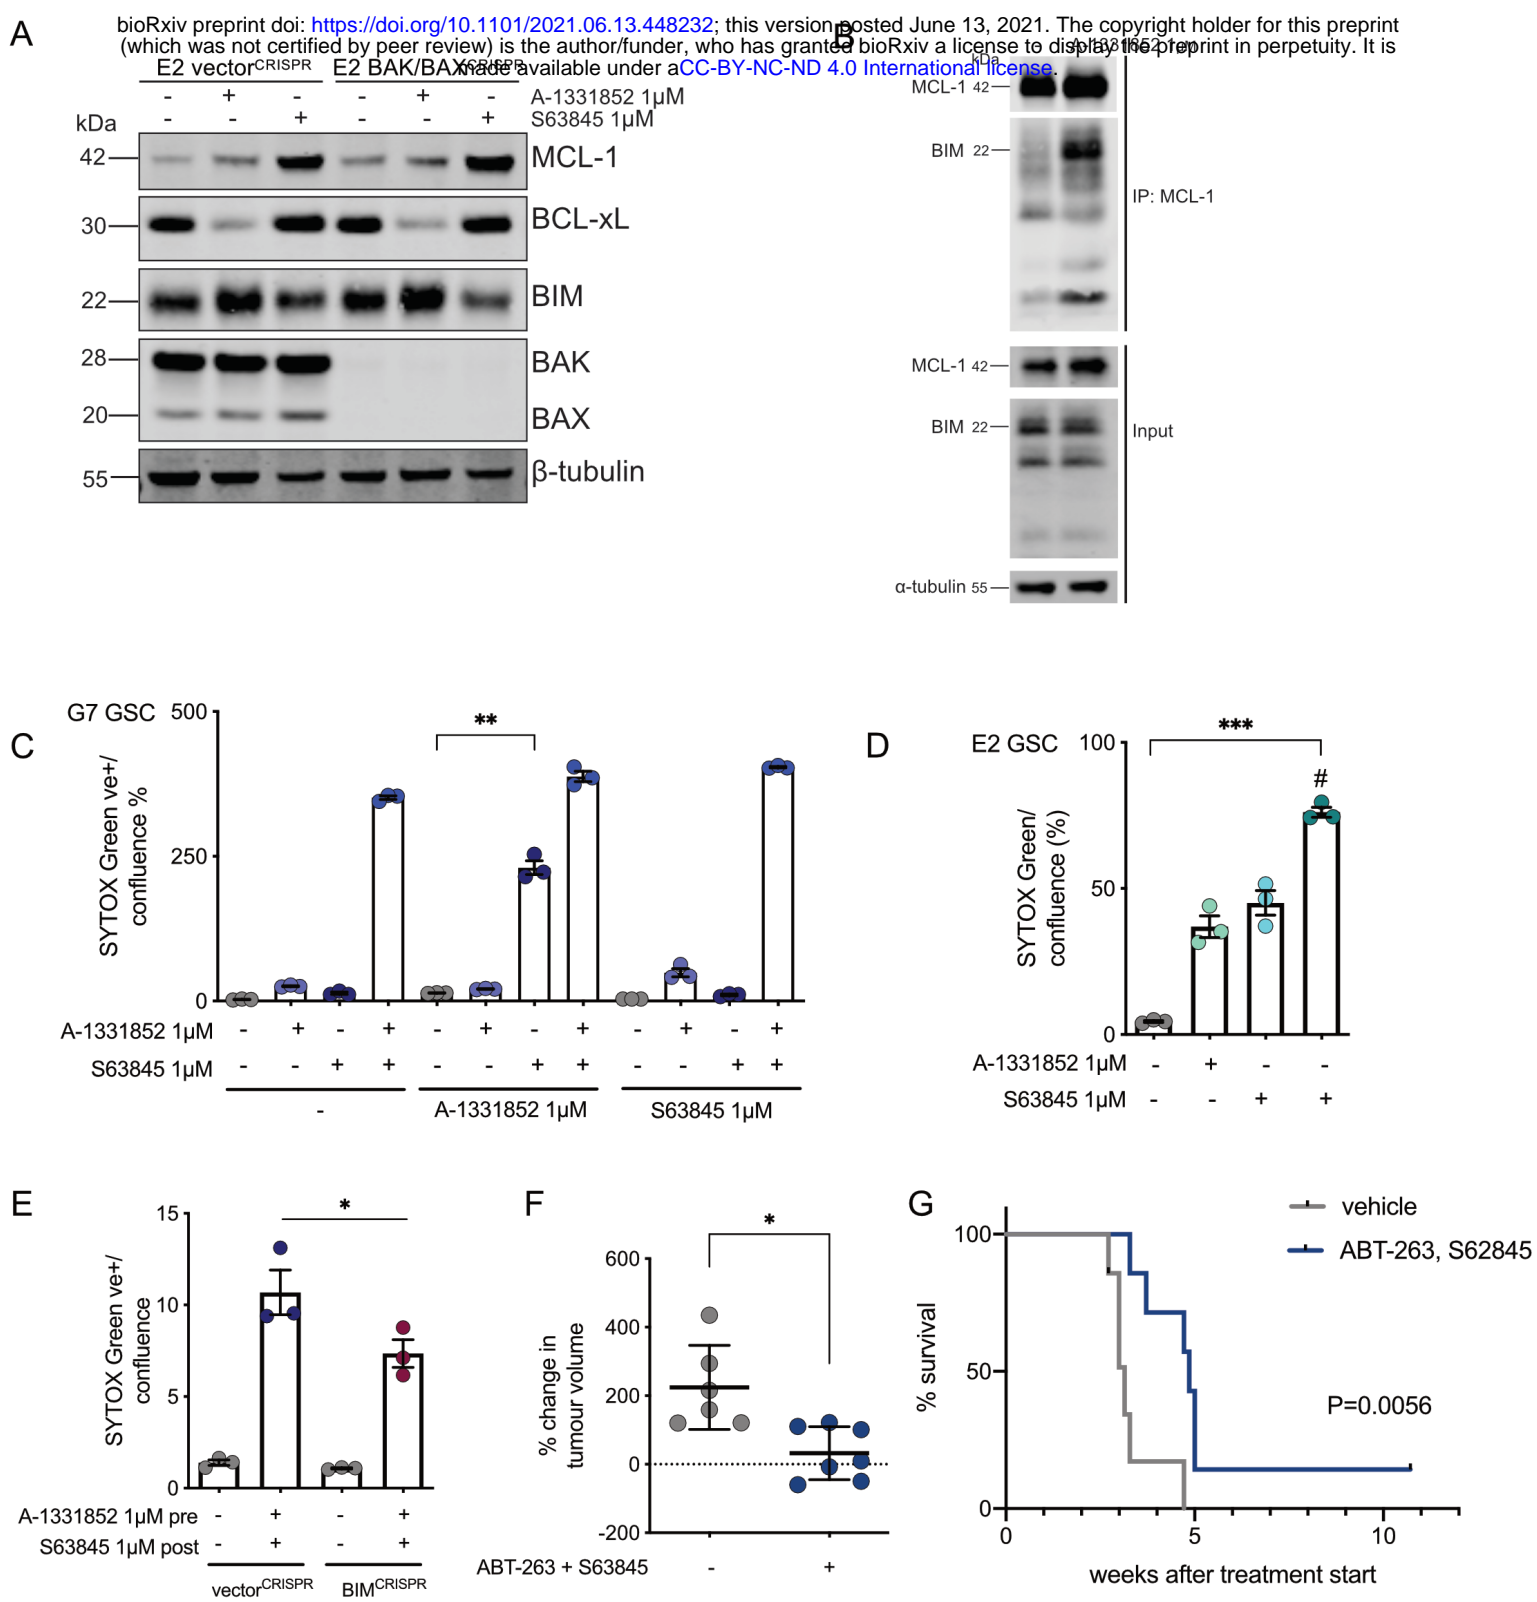

**Figure 6**

A

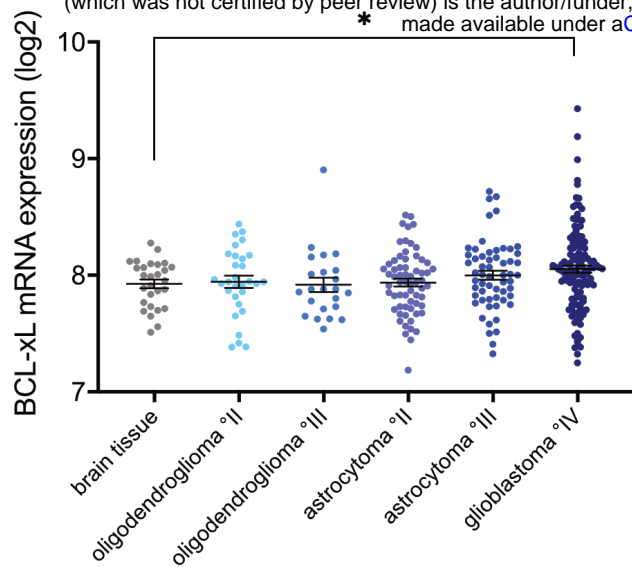

B

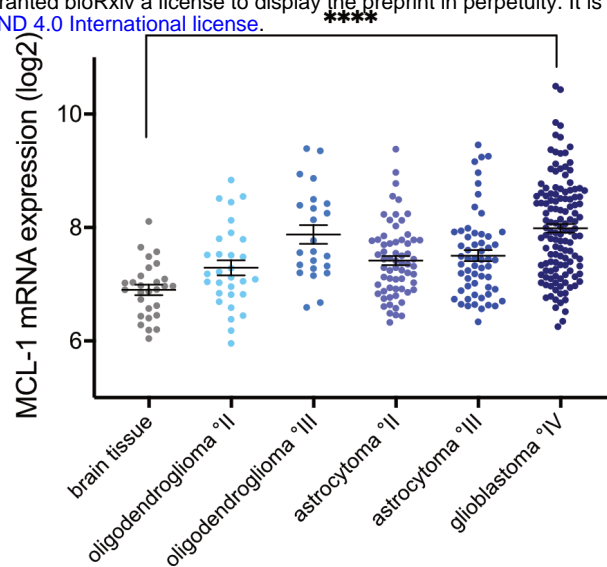

D

### Glioblastoma patient sample

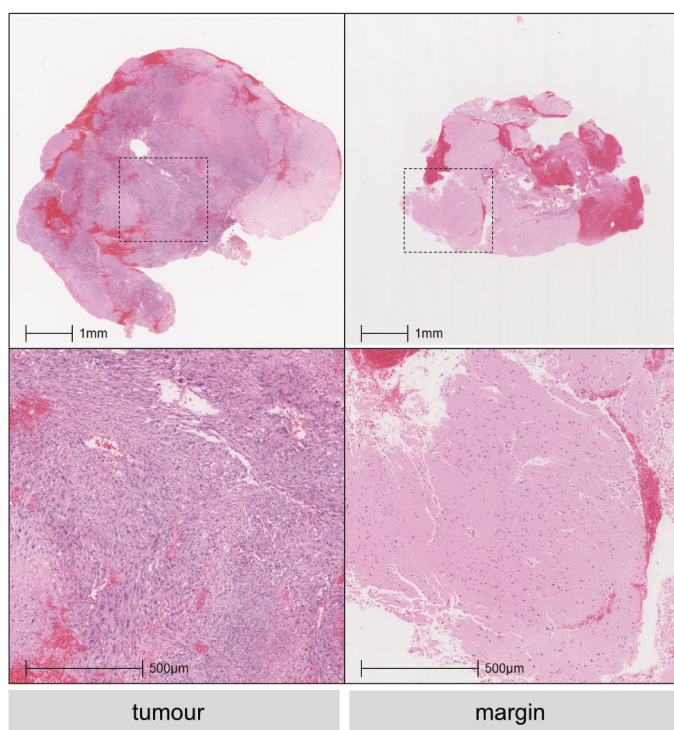

A

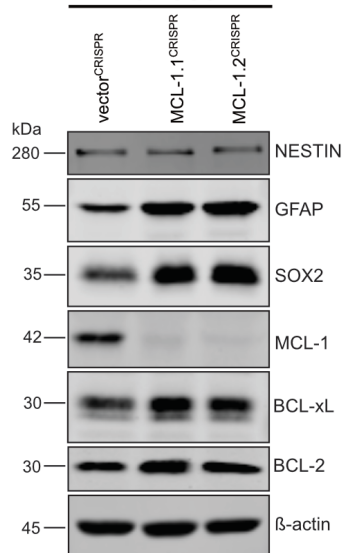

B

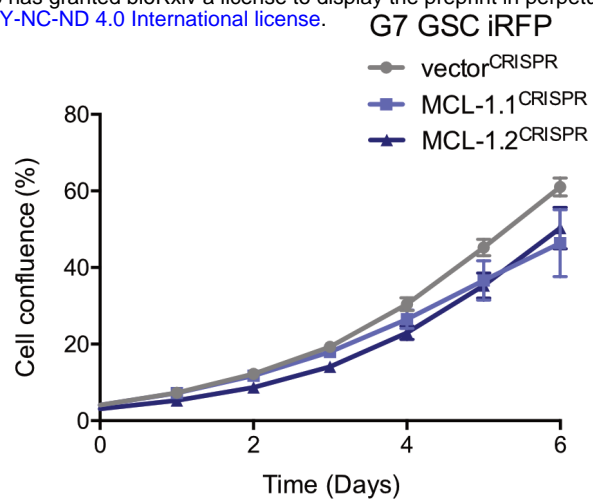

C

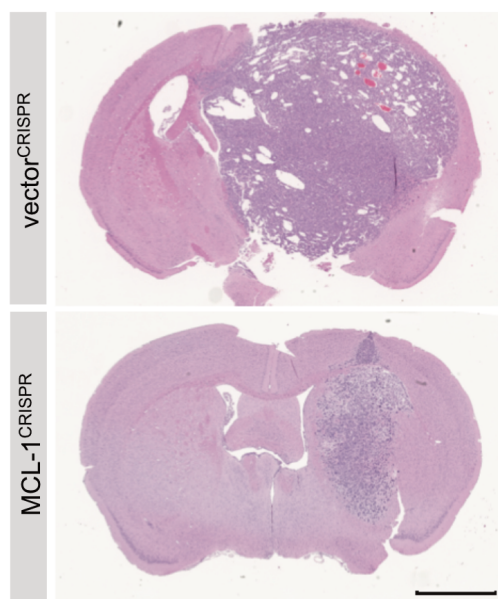

D

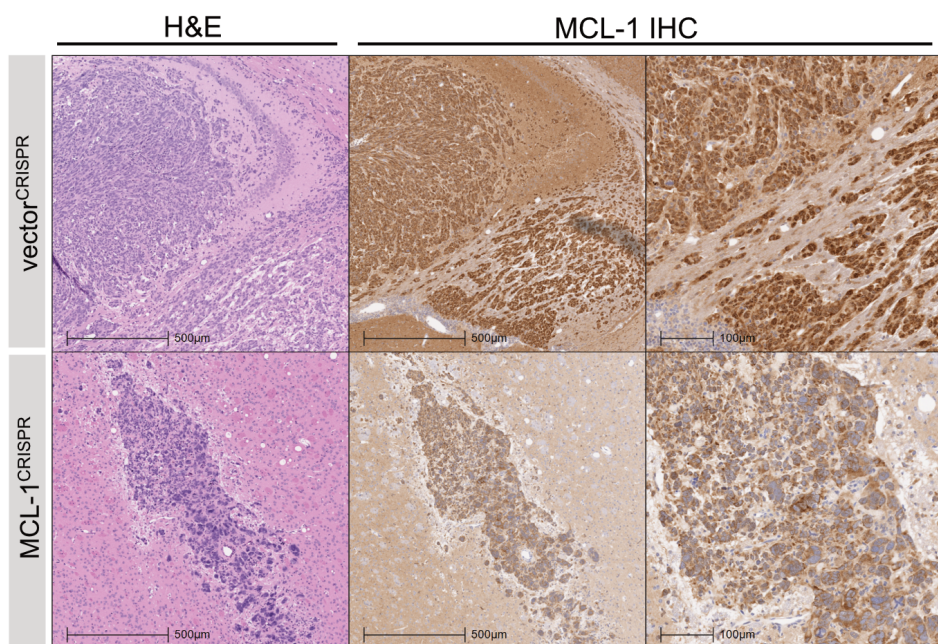



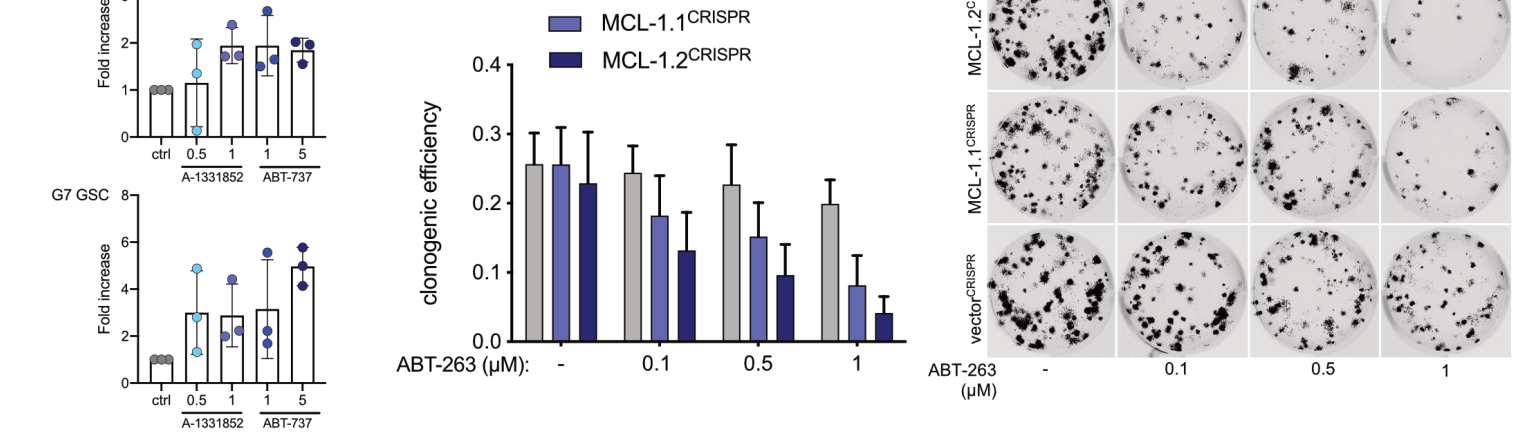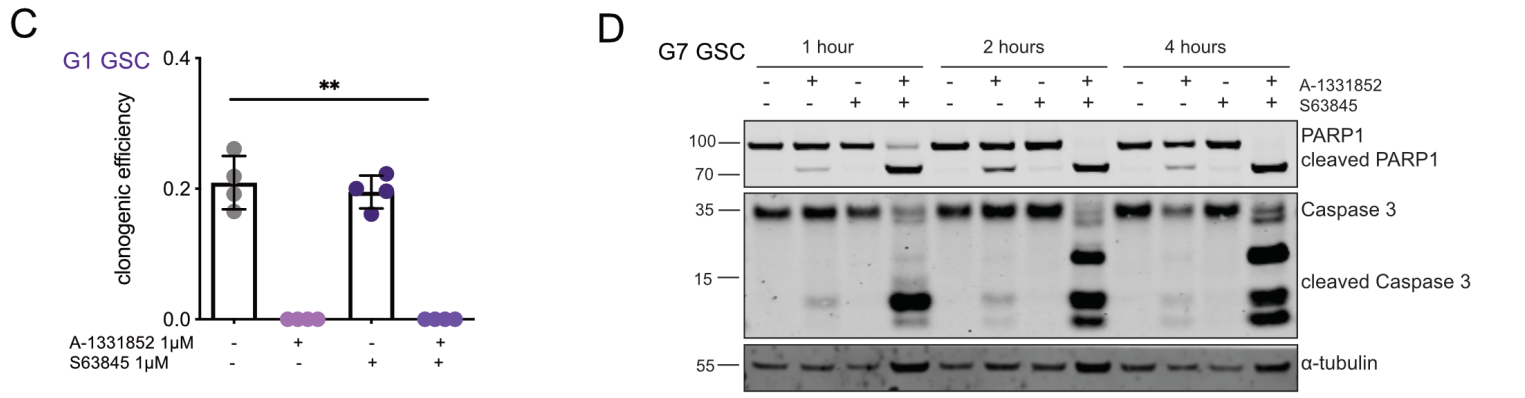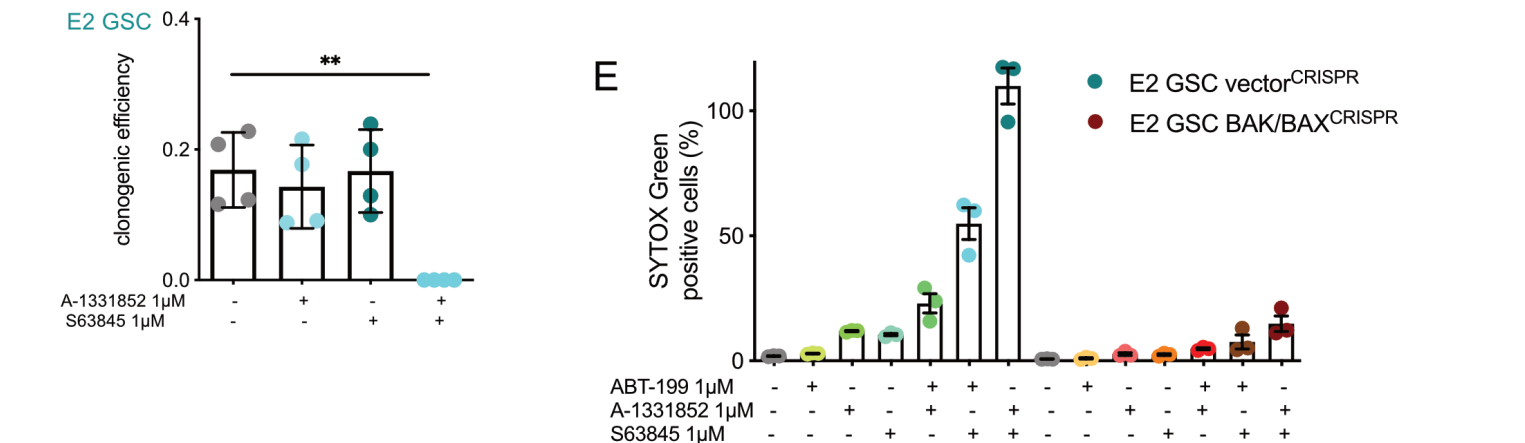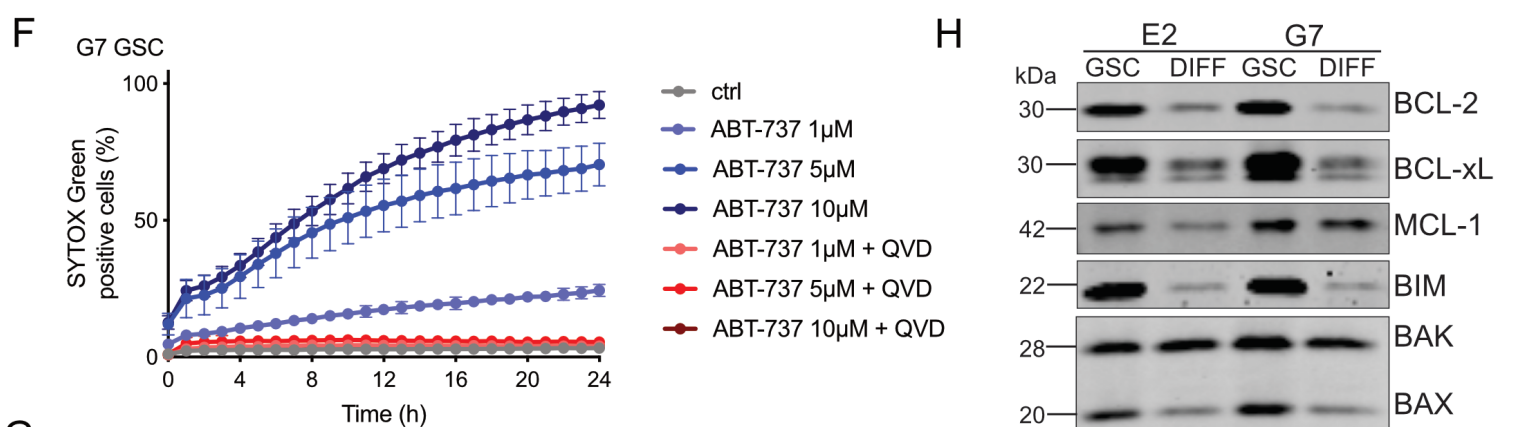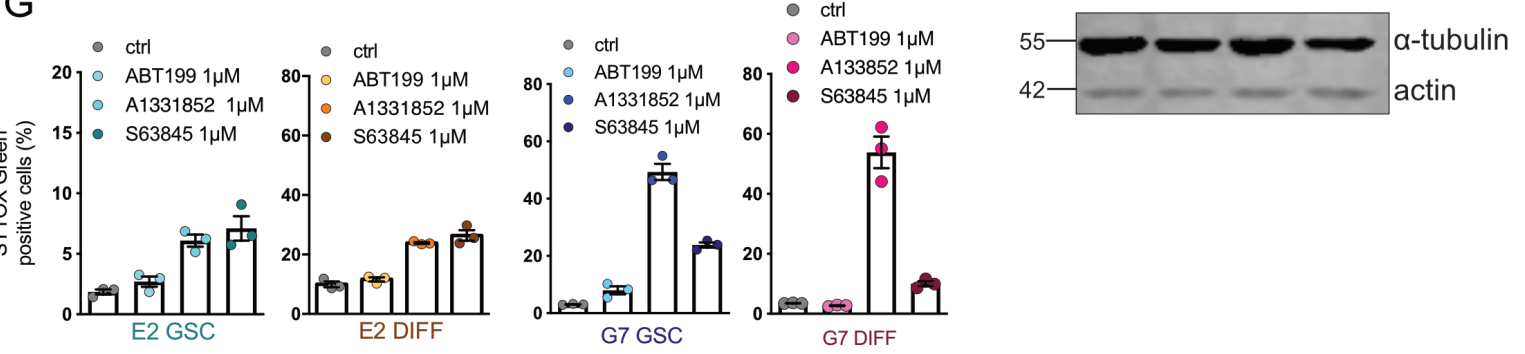

**A**

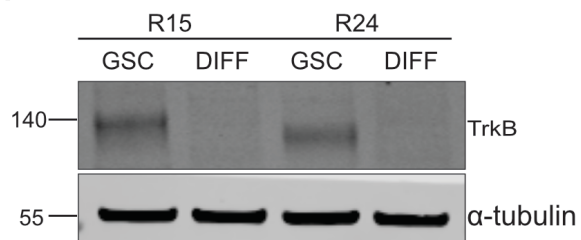

**B**

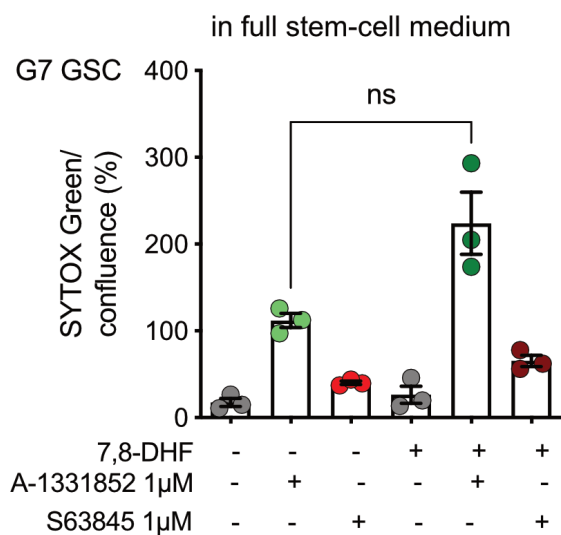

**C**

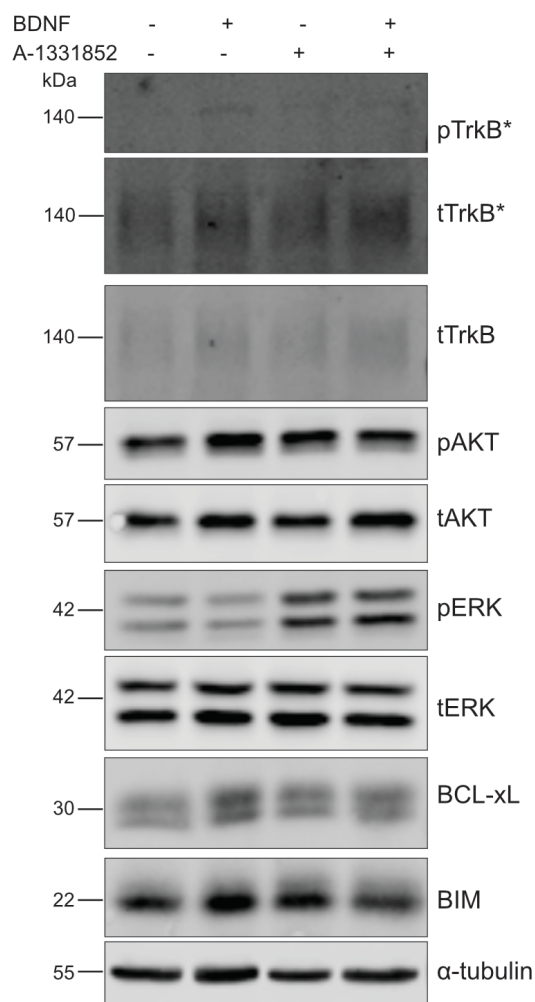

A

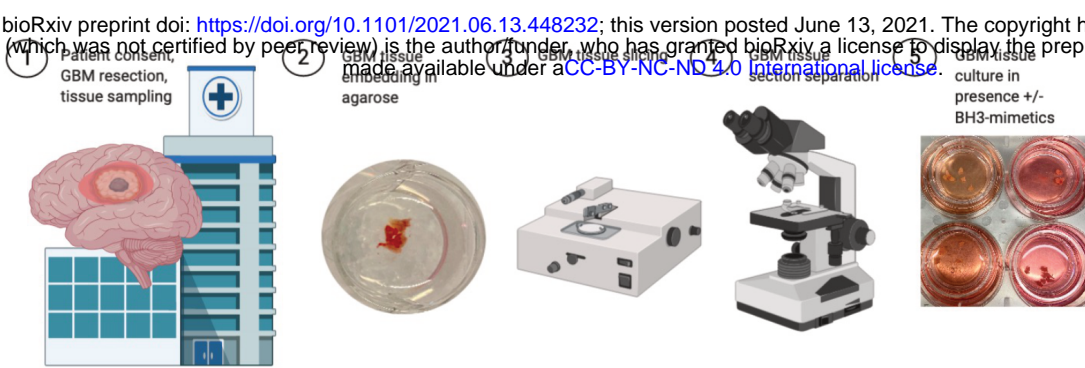

B

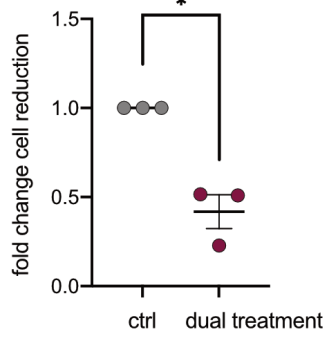

E

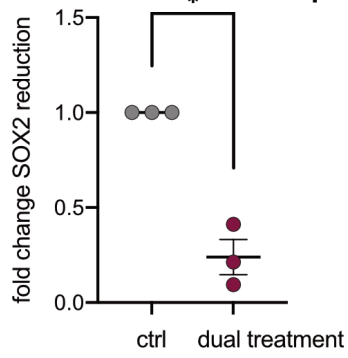

F

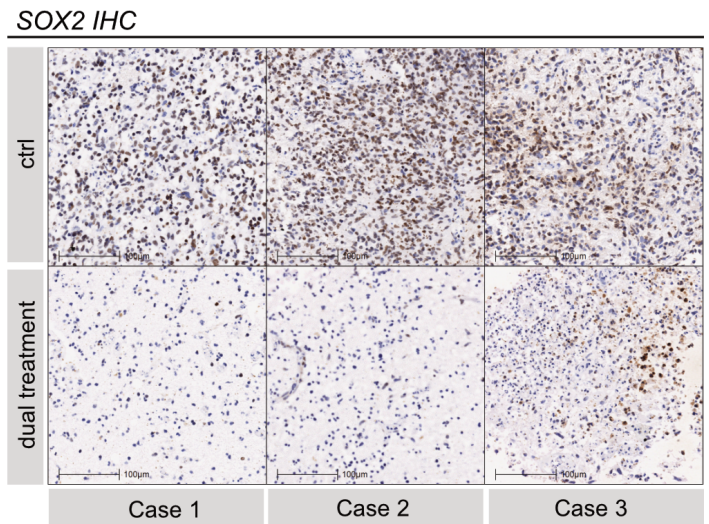

C

Case 1: single treatments

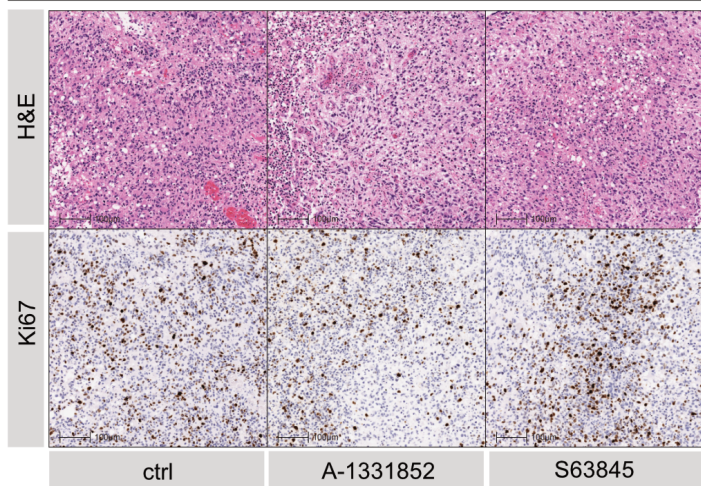

D

Case 2: single treatments

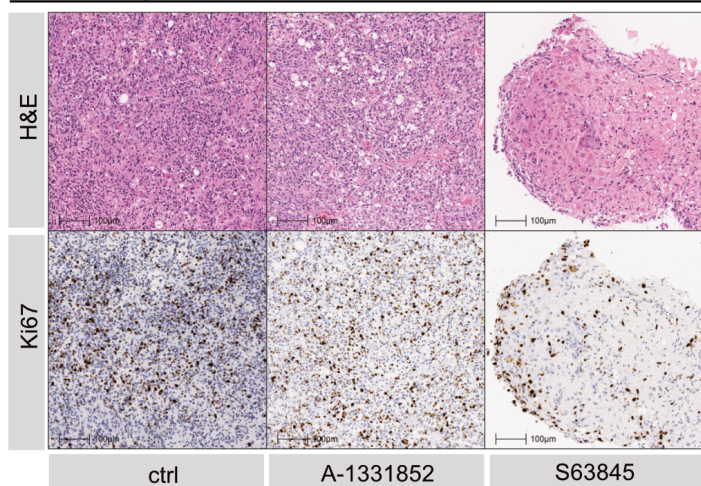

G

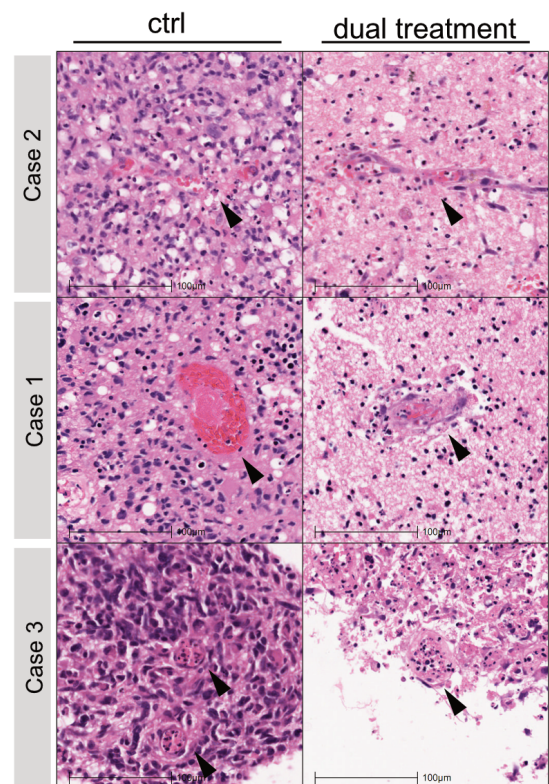

1 **Supplementary Figure legends**

2 **Supplementary Figure 1. Relevant to Figure 1.**

3 (A,B) BCL-xL and MCL-1 mRNA expression from the publicly available REMBRANDT GBM  
4 microarray dataset. Data plotted for different glioma subtypes and normal brain tissue. Error  
5 bars represent mean +/-SEM (\*p=0.0118, \*\*\*\*p<0.0001) Welch's test. (C) Corresponding  
6 representative H&E images of GBM tumour and margin samples shown in lower  
7 magnification than in Figure 1D.

8

9 **Supplementary Figure 2. Relevant to Figure 2.**

10 (A) Immunoblotting of G7 GSC vector<sup>CRISPR</sup>, MCL1.1<sup>CRISPR</sup> and MCL1.2<sup>CRISPR</sup> for BCL-2  
11 family proteins, cell-line specific neural stem cell marker (SOX2, NESTIN) and astrocyte  
12 lineage differentiation marker GFAP. Actin served as loading control. (B) Proliferation assay  
13 of indicated cell lines using IncuCyte Imager and – percentage cell density over 6 days.  
14 Error bars represent mean +/-SD from n=3 independent experiments. (C) Representative  
15 H&E images of G7 GSC iRFP vector<sup>CRISPR</sup> and MCL1<sup>CRISPR</sup> orthotopic xenografts at end  
16 point (corresponding to Figure 2B). Scale bar = 100µm. (D) Representative images of H&E  
17 and MCL-1 IHC of G7 GSC iRFP vector<sup>CRISPR</sup> and MCL1<sup>CRISPR</sup> orthotopic xenografts at end  
18 point.

19

20 **Supplementary Figure 3. Relevant to Figure 3.**

21 (A) Quantification of immunoblots shown in Figure 3A. (B) Clonogenic survival assay of G7  
22 GSC iRFP vector<sup>CRISPR</sup> vs. MCL1.1<sup>CRISPR</sup> and MCL1.2<sup>CRISPR</sup> treated with indicated drugs 16  
23 hours after plating 250 cells per well. Colonies counted manually after 14 days. Error bars  
24 represent mean +/-SD from n=4 independent experiments. Representative images scanned  
25 on LICOR imager. (C) Clonogenic survival assay of E2 and G1 GSC iRFP treated with  
26 indicated drugs 16 hours after plating 250 cells per well. Colonies counted manually after 14  
27 days. Error bars represent mean +/-SEM from n=4 independent experiments (E2\*\*p=0.0099,  
28 G1\*\*p=0.002) Welch's test. (D) G7 GSC were treated with DMSO (-), A-1331852 and

29 S63845 for indicated times, harvested and protein expression was analysed by immunoblot.  
30  $\alpha$ -tubulin served as loading control. Representative image from three independent  
31 experiments. (E) E2 GSC vector<sup>CRISPR</sup> and BAK/BAX<sup>CRISPR</sup> treated with indicated drugs for 48  
32 hours and analysed for cell viability using an IncuCyte imager and SYTOX Green exclusion.  
33 Percentage cell death was calculated by normalising against maximal cell death as  
34 described in Figure 1B. Error bars represent mean +/-SEM from n=3 independent  
35 experiments. (F) G7 GSC treated with indicated drugs (+/-QVD 10 $\mu$ M) for 24 hours and  
36 analysed for cell viability using an IncuCyte imager and SYTOX Green exclusion.  
37 Percentage cell death was calculated by normalising against maximal cell death as  
38 described in Figure 1B. Error bars represent mean +/-SEM from n=3 independent  
39 experiments. (G) E2 and G7 GSC with paired DIFF cells treated with indicated drugs for 24  
40 hours and analysed for cell viability using an IncuCyte imager and SYTOX Green exclusion.  
41 Percentage cell death was calculated by normalising against maximal cell death as  
42 described in Figure 1B. Error bars represent mean +/-SEM from n=3 independent  
43 experiments. (H) Immunoblot of E2 and G7 GSC with paired DIFF cells for BCL-2 family  
44 proteins.  $\alpha$ -tubulin served as loading control. Representative image from n=2 independent  
45 experiments.

46

47 **Supplementary Figure 4. Relevant to Figure 4.**

48 (A) Immunoblot of TrkB in R15 and R24 GSC compared with paired DIFF cells.  $\alpha$ -tubulin  
49 served as loading control. Representative image from n=2 independent experiments. (B) G7  
50 GSC treated with indicated drugs for 24h hours in full stem-cell medium (including EGF and  
51 FGF) and analysed for cell viability using an IncuCyte imager and SYTOX Green exclusion.  
52 Error bars represent mean +/-SEM from n=3 independent experiments. (ns, p=0.0817)  
53 Welch's test. (C) G7 DIFF were treated with A-1331852 2 $\mu$ M +/- BDNF (100ng/mL) for 1  
54 hour, harvested and protein expression was analysed by immunoblot (\*indicates high

55 exposure).  $\alpha$ -tubulin served as loading control. Representative image from n=3 independent  
56 experiments.

57

58 **Supplementary Figure 5. Relevant to Figure 5.**

59 (A) Schematic model of fresh GBM patient tissue collection and processing. (B)  
60 Quantification of cell reduction in GBM case 1-3 normalised to DMSO-treated control. Error  
61 bars represent mean  $\pm$  SEM (\*p=0.0257) Welch's test. (C,D) Representative H&E and Ki67  
62 IHC images of GBM patients case 1 and 2 treated with single inhibitors A-1331852 2 $\mu$ M or  
63 S63845 2 $\mu$ M for 72 hours. In both cases H&E control images were used from the same area  
64 as shown in Figure 5A,B in different magnification. (E) Quantification of SOX2 positive cell  
65 reduction in GBM case 1-3 normalised to DMSO-treated control. Error bars represent mean  
66  $\pm$  SEM (\*p=0.0145) Welch's test. (F) Representative images of SOX2 IHC in GBM case 1-3.  
67 (G) Representative H&E images of GBM case 1-3, arrows indicate intratumoural vessels.

68

69 **Supplementary Figure 6. Relevant to Figure 6.**

70 (A) Immunoblot of E2 and G7 GSC vector<sup>CRISPR</sup> and BIM<sup>CRISPR</sup> for BCL-xL, MCL-1 and BIM.  
71 Representative images from n=2 independent experiments.  $\alpha$ -tubulin served as loading  
72 control. (B) G7 GSC vector<sup>CRISPR</sup> and BIM<sup>CRISPR</sup> treated with DMSO or indicated combination  
73 for 24 hours and analysed for cell viability using an IncuCyte imager and SYTOX Green  
74 exclusion. Error bars represent mean  $\pm$  SD from n=3 independent experiments. (C)  
75 Representative images of U87MG neurospheres in stem-cell medium under treatment with  
76 indicated drugs over a total of 60 hours. Quantification of neurosphere treatment for cell  
77 viability using an IncuCyte imager and SYTOX Green exclusion given as mean signal  
78 intensity (GCU). One representative of n=3 independent experiments shown. Error bars  
79 represent mean  $\pm$  SD. (D) Clonogenic survival assay of U87MG. Treatment commenced 16  
80 hours after plating 250 cells/well with either DMSO or ABT-263 5 $\mu$ M for 24 hours followed by  
81 drug washout and treatment pause for 24 hours and S63845 2 $\mu$ M for 24 hours. Alternating

82 treatment was continued over the experimental period of 14 days. Colonies were counted  
83 manually. Quantification of one representative of n=2 independent experiments shown.  
84 Representative images of a replicate in one independent repeat scanned on LICOR imager.  
85 **(E)** Schematic of treatment schedule for *in vivo* study. **(F)** Percent weight change of mice  
86 (vehicle n=6, ABT-236, S63845 n=7) during the drug treatment period of the experiment in  
87 Figure 1G,H. **(G)** Representative H&E and Ki67 IHC images of U87MG xenografts treated  
88 with vehicle or alternating ABT-263 and S63845 therapy at end point.  
89
